# Supplementary material for: Xyloplains A–F, six new guaiane-type sesquiterpenoid dimers from Xylopia vielana
Source: Royal Society of Chemistry journal article supplement (doi:10.1039/c8ra04356f), 2018-01-01
Supplement: c8ra04356f1.pdf [file c8ra04356f1.pdf]

## Electronic Supplementary Information

### **Xyloplains A–F, six new guaiane-type sesquiterpenoid dimers from**

#### ***Xylopia vielana***

Yang-Guo Xie <sup>a, 1</sup>, Weiyue Zhang <sup>a, 1</sup>, Sheng-lan Zhu<sup>a</sup>, Tao-fang Cheng <sup>a</sup>, Guo-jing Wu <sup>a</sup>, Ishaq Muhammad <sup>a</sup> Shi-kai Yan <sup>a</sup>, Yan Zhang<sup>a\*</sup>, Hui-zi Jin <sup>a\*</sup>, Wei-dong Zhang <sup>a,b\*</sup>

<sup>a</sup>School of Pharmacy, Shanghai Jiao Tong University, Shanghai 200240, P. R. China.

<sup>b</sup>School of Pharmacy, Second Military Medical University, Shanghai 200433, P. R. China.

\*Corresponding authors: E-mail: wdzhangy@hotmail.com (W. D. Zhang); kimhz@sjtu.edu.cn; zhangyan\_sjtu@sjtu.edu.cn

Fax: +86-21-34205989; Tel: +86-21-34205989 (H. Z. Jin)

<sup>1</sup>These authors contributed equally to this work.

## Content

- Fig. S1**  $^1\text{H}$  NMR spectrum (500 MHz, Chloroform-*d*) of compound **1**
- Fig. S2**  $^{13}\text{C}$  NMR spectrum (125 MHz, Chloroform-*d*) of compound **1**
- Fig. S3** DEPT spectrum (125 MHz, Chloroform-*d*) of compound **1**
- Fig. S4**  $^1\text{H}$ - $^1\text{H}$  COSY spectrum (500 MHz, Chloroform-*d*) of compound **1**
- Fig. S5** HSQC spectrum (500 MHz, Chloroform-*d*) of compound **1**
- Fig. S6** HMBC spectrum (500 MHz, Chloroform-*d*) of compound **1**
- Fig. S7** NOESY spectrum (500 MHz, Chloroform-*d*) of compound **1**
- Fig. S8** HR-ESI-MS spectrum of compound **1**
- Fig. S9**  $^1\text{H}$  NMR spectrum (500 MHz,  $\text{CD}_3\text{OD}$ ) of compound **2**
- Fig. S10**  $^{13}\text{C}$  NMR spectrum (125 MHz,  $\text{CD}_3\text{OD}$ ) of compound **2**
- Fig. S11** DEPT spectrum (125 MHz,  $\text{CD}_3\text{OD}$ ) of compound **2**
- Fig. S12**  $^1\text{H}$ - $^1\text{H}$  COSY spectrum (500 MHz,  $\text{CD}_3\text{OD}$ ) of compound **2**
- Fig. S13** HSQC spectrum (500 MHz,  $\text{CD}_3\text{OD}$ ) of compound **2**
- Fig. S14** HMBC spectrum (500 MHz,  $\text{CD}_3\text{OD}$ ) of compound **2**
- Fig. S15** NOESY spectrum (500 MHz,  $\text{CD}_3\text{OD}$ ) of compound **2**
- Fig. S16** HR-ESI-MS spectrum of compound **2**
- Fig. S17**  $^1\text{H}$  NMR spectrum (500 MHz,  $\text{CD}_3\text{OD}$ ) of compound **3**
- Fig. S18**  $^{13}\text{C}$  NMR spectrum (125 MHz,  $\text{CD}_3\text{OD}$ ) of compound **3**
- Fig. S19** DEPT spectrum (125 MHz,  $\text{CD}_3\text{OD}$ ) of compound **3**
- Fig. S20**  $^1\text{H}$ - $^1\text{H}$  COSY spectrum (500 MHz,  $\text{CD}_3\text{OD}$ ) of compound **3**
- Fig. S21** HSQC spectrum (500 MHz,  $\text{CD}_3\text{OD}$ ) of compound **3**
- Fig. S22** HMBC spectrum (500 MHz,  $\text{CD}_3\text{OD}$ ) of compound **3**
- Fig. S23** NOESY spectrum (500 MHz,  $\text{CD}_3\text{OD}$ ) of compound **3**
- Fig. S24** HR-ESI-MS spectrum of compound **3**
- Fig. S25**  $^1\text{H}$  NMR spectrum (500 MHz, Chloroform-*d*) of compound **4**
- Fig. S26**  $^{13}\text{C}$  NMR spectrum (125 MHz, Chloroform-*d*) of compound **4**
- Fig. S27** DEPT spectrum (125 MHz, Chloroform-*d*) of compound **4**
- Fig. S28**  $^1\text{H}$ - $^1\text{H}$  COSY spectrum (500 MHz, Chloroform-*d*) of compound **4**
- Fig. S29** HSQC spectrum (500 MHz, Chloroform-*d*) of compound **4**
- Fig. S30** HMBC spectrum (500 MHz, Chloroform-*d*) of compound **4**
- Fig. S31** NOESY spectrum (500 MHz, Chloroform-*d*) of compound **4**
- Fig. S32** HR-ESI-MS spectrum of compound **4**
- Fig. S33**  $^1\text{H}$  NMR spectrum (500 MHz, Chloroform-*d*: $\text{CD}_3\text{OD}$  1:2) of compound **5**
- Fig. S34**  $^{13}\text{C}$  NMR spectrum (125 MHz, Chloroform-*d*: $\text{CD}_3\text{OD}$  1:2) of compound **5**
- Fig. S35** DEPT spectrum (125 MHz, Chloroform-*d*: $\text{CD}_3\text{OD}$  1:2) of compound **5**
- Fig. S36**  $^1\text{H}$ - $^1\text{H}$  COSY spectrum (500 MHz, Chloroform-*d*: $\text{CD}_3\text{OD}$  1:2) of compound **5**
- Fig. S37** HSQC spectrum (500 MHz, Chloroform-*d*: $\text{CD}_3\text{OD}$  1:2) of compound **5**

**Fig. S38** HMBC spectrum (500 MHz, Chloroform-*d*:CD<sub>3</sub>OD 1:2) of compound **5**

**Fig. S39** NOESY spectrum (500 MHz, Chloroform-*d*:CD<sub>3</sub>OD 1:2) of compound **5**

**Fig. S40** HR-ESI-MS spectrum of compound **5**

**Fig. S41** <sup>1</sup>H NMR spectrum (500 MHz, Chloroform-*d*) of compound **6**

**Fig. S42** <sup>13</sup>C NMR spectrum (125 MHz, Chloroform-*d*) of compound **6**

**Fig. S43** DEPT spectrum (125 MHz, Chloroform-*d*) of compound **6**

**Fig. S44** <sup>1</sup>H-<sup>1</sup>H COSY spectrum (500 MHz, Chloroform-*d*) of compound **6**

**Fig. S45** HSQC spectrum (500 MHz, Chloroform-*d*) of compound **6**

**Fig. S46** HMBC spectrum (500 MHz, Chloroform-*d*) of compound **6**

**Fig. S47** NOESY spectrum (500 MHz, Chloroform-*d*) of compound **6**

**Fig. S48** HR-ESI-MS spectrum of compound **6**

**Fig. S49** The CD spectrum of compounds **5-6**

**Fig. S50** Inhibitory effect of compounds **1–6** (50 μM 10 μM) against NO production in LPS-stimulated RAW264.7 macrophages and cytotoxic effects of compounds **1–6** in the MTT assay (Raw 264.7 cells). [C: control; L: LPS group; P: positive group] Parthenolide (10 μM) was used as a positive control.

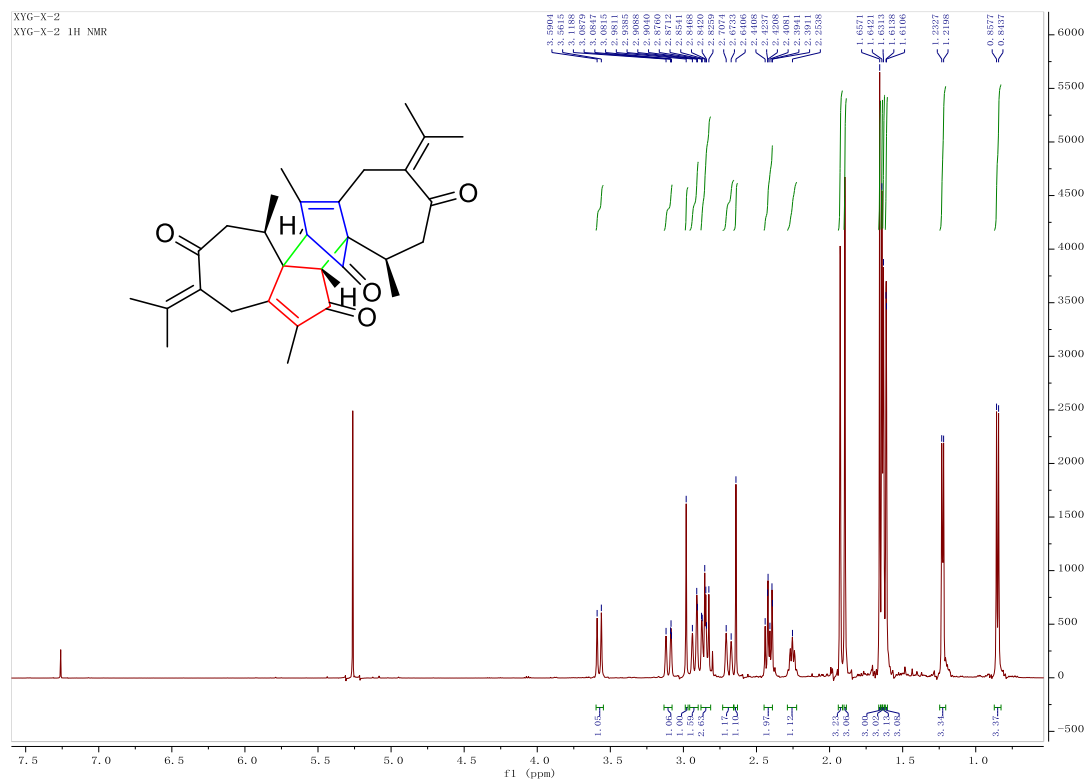

**Fig. S1**  $^1\text{H}$  NMR spectrum (500 MHz, Chloroform-*d*) of compound **1**

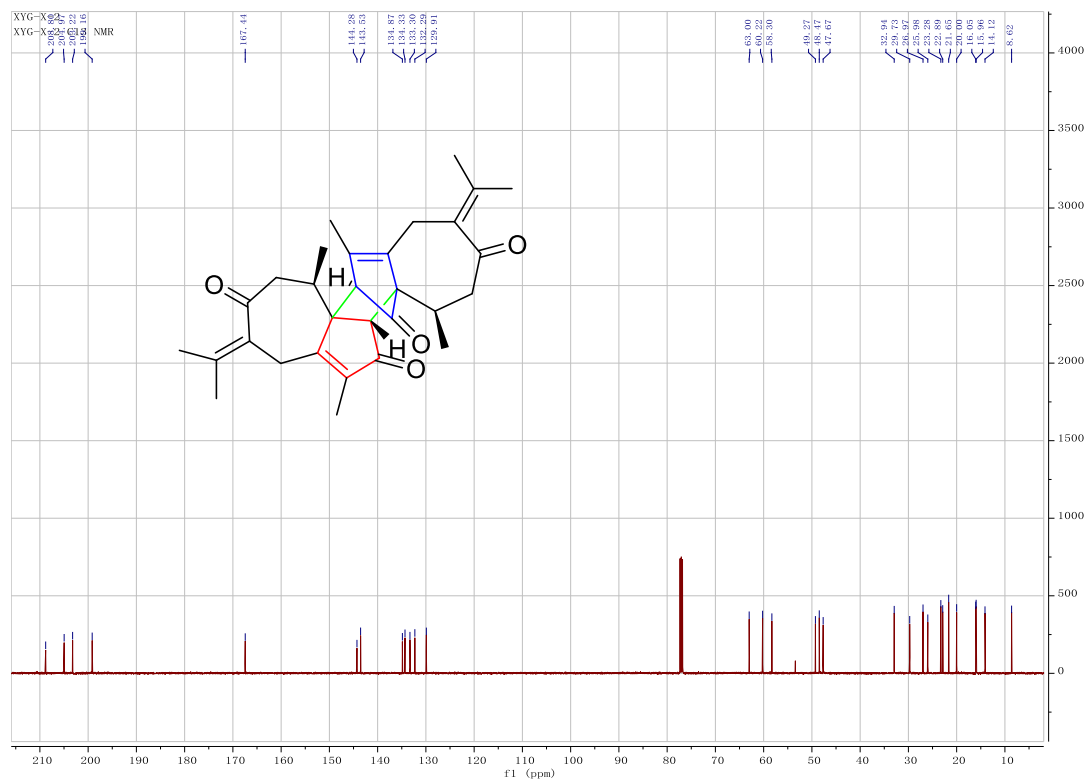

**Fig. S2**  $^{13}\text{C}$  NMR spectrum (125 MHz, Chloroform-*d*) of compound **1**

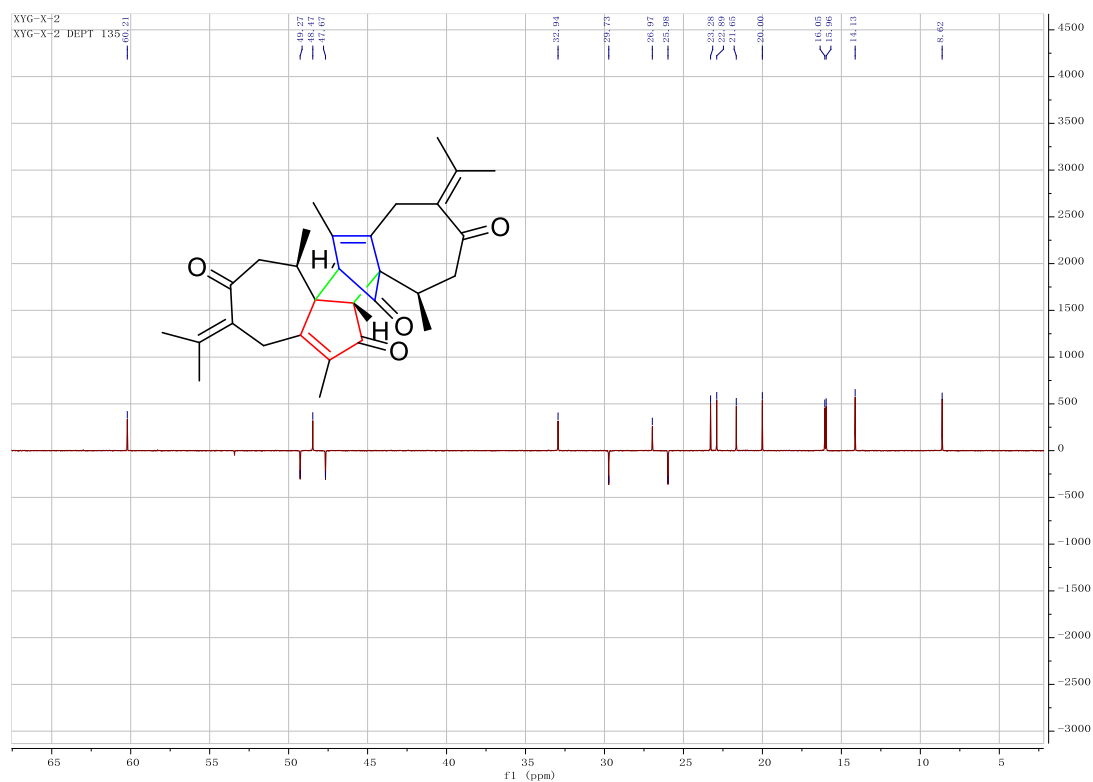

**Fig. S3** DEPT spectrum (125 MHz, Chloroform-*d*) of compound **1**

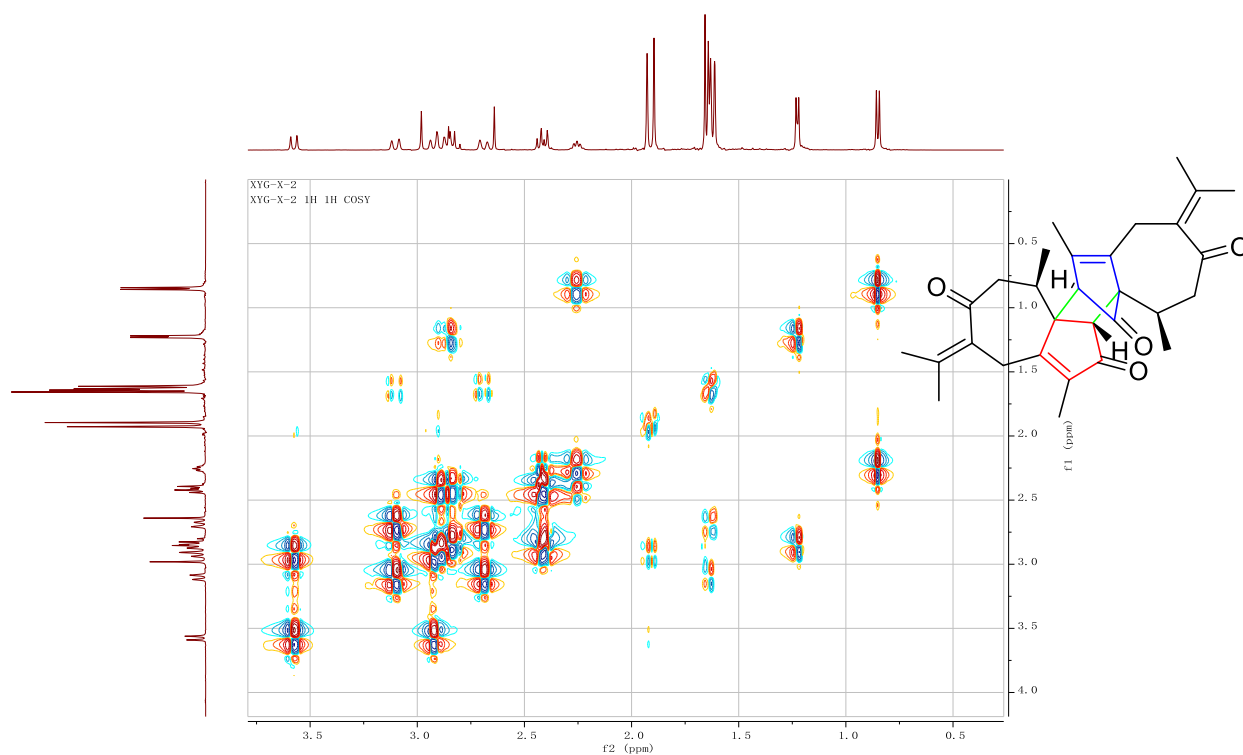

**Fig. S4**  $^1\text{H}$ - $^1\text{H}$  COSY spectrum (500 MHz, Chloroform-*d*) of compound **1**

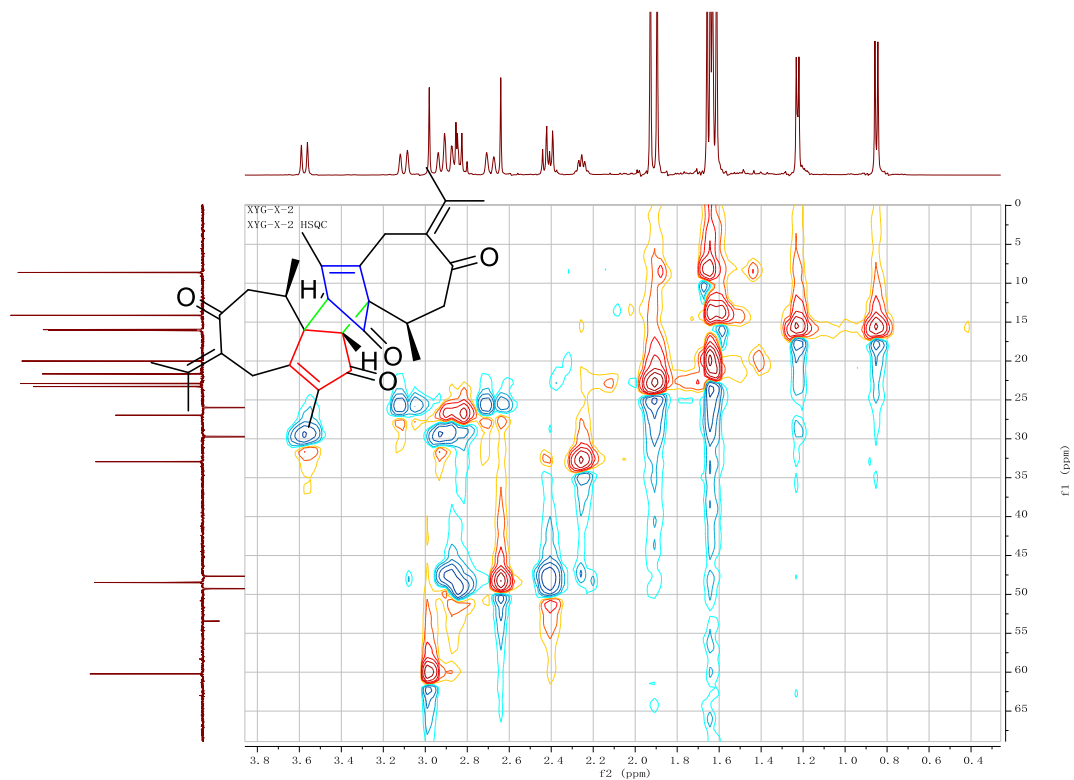

**Fig. S5** HSQC spectrum (500 MHz, Chloroform-*d*) of compound **1**

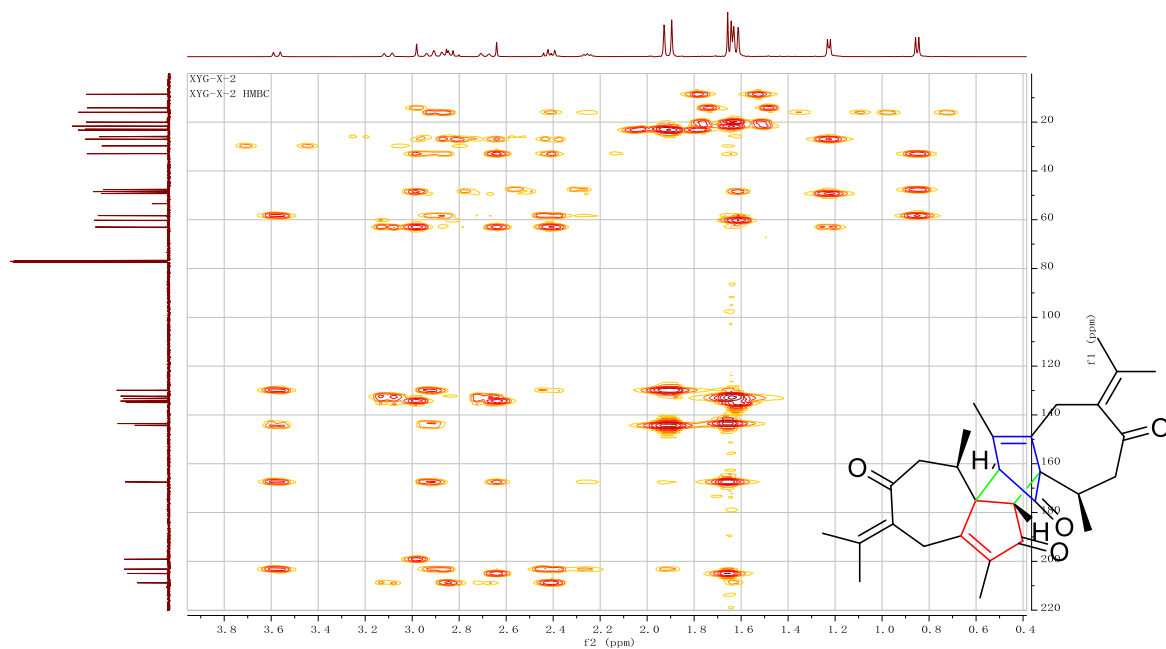

**Fig. S6** HMBC spectrum (500 MHz, Chloroform-*d*) of compound **1**

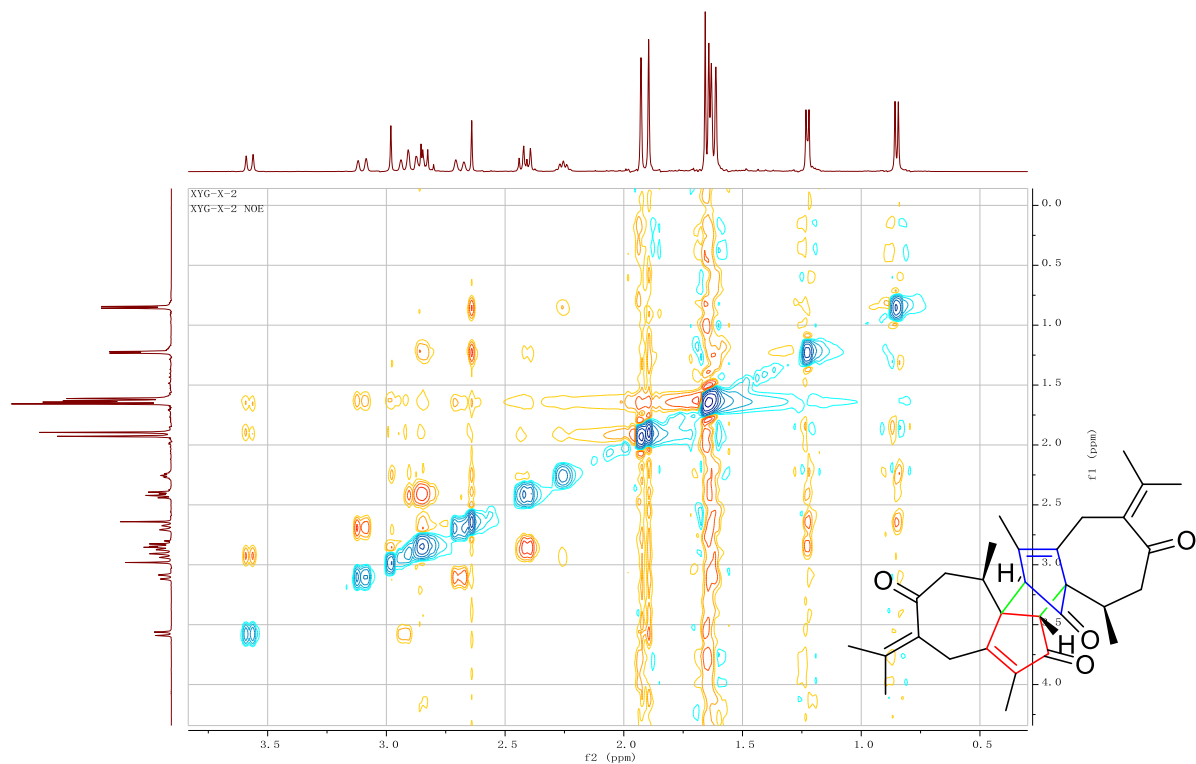

**Fig. S7** NOESY spectrum (500 MHz, Chloroform-*d*) of compound **1**

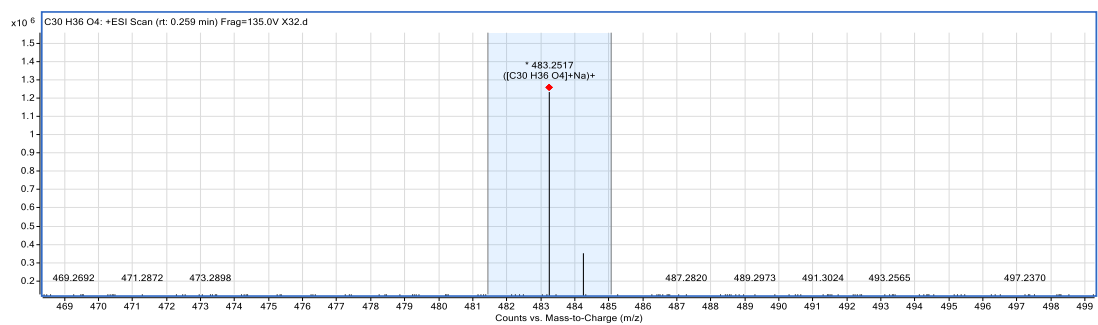

**Fig. S8** HR-ESI-MS spectrum of compound **1**

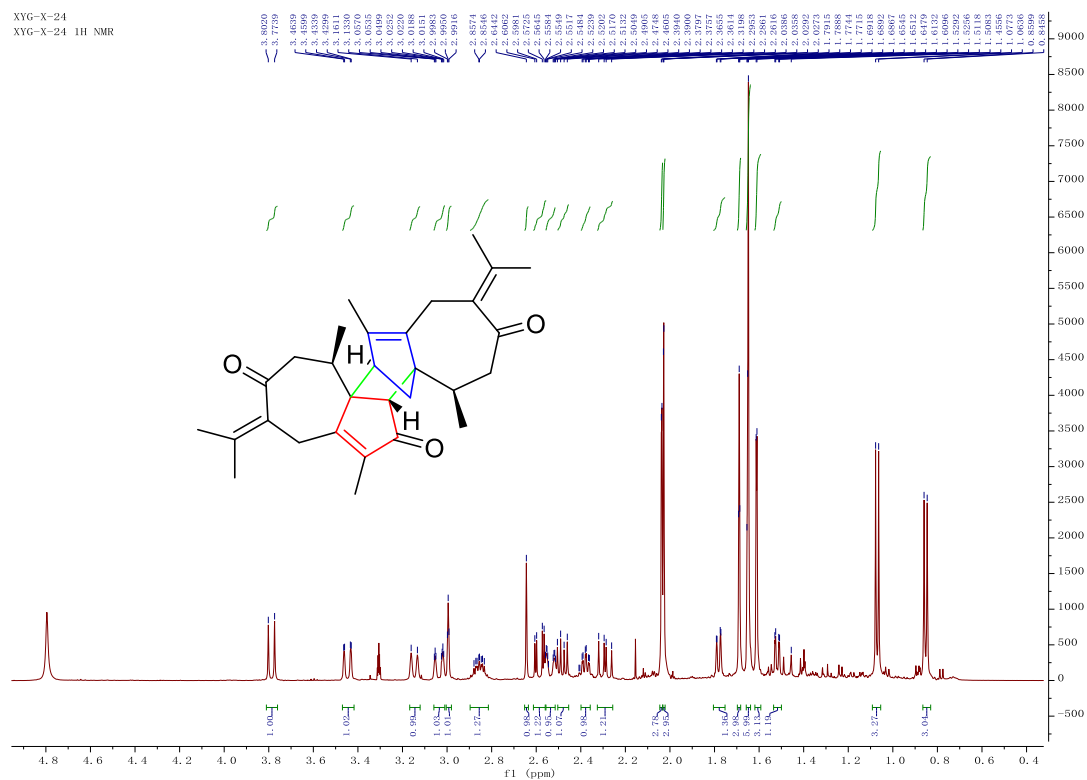

**Fig. S9** <sup>1</sup>H NMR spectrum (500 MHz, CD<sub>3</sub>OD) of compound **2**

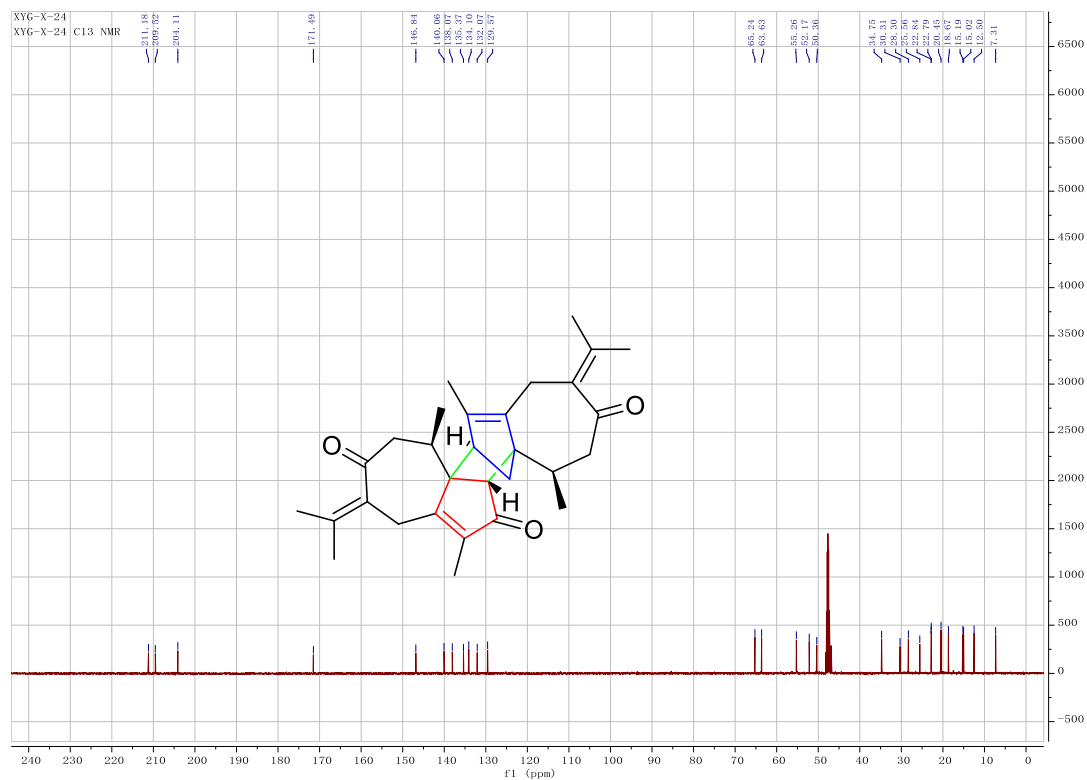

**Fig. S10** <sup>13</sup>C NMR spectrum (125 MHz, CD<sub>3</sub>OD) of compound **2**



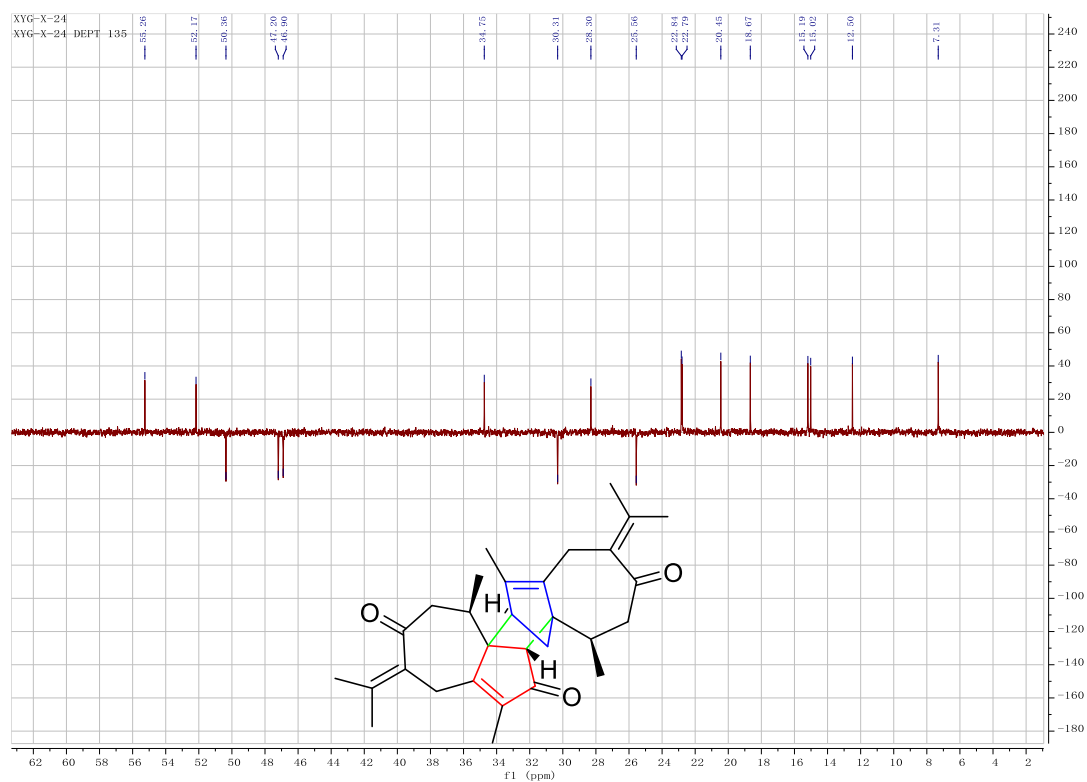

Fig. S11 DEPT spectrum (125 MHz, CD<sub>3</sub>OD) of compound 2

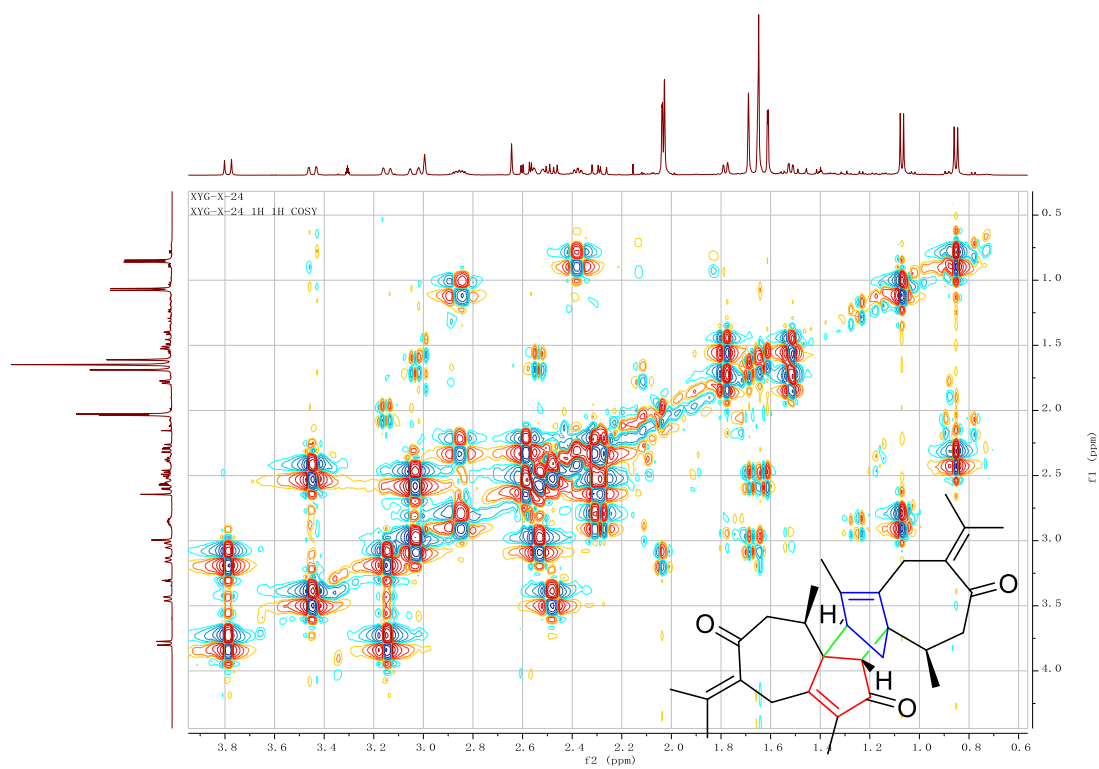

Fig. S12 <sup>1</sup>H-<sup>1</sup>H COSY spectrum (500 MHz, CD<sub>3</sub>OD) of compound 2

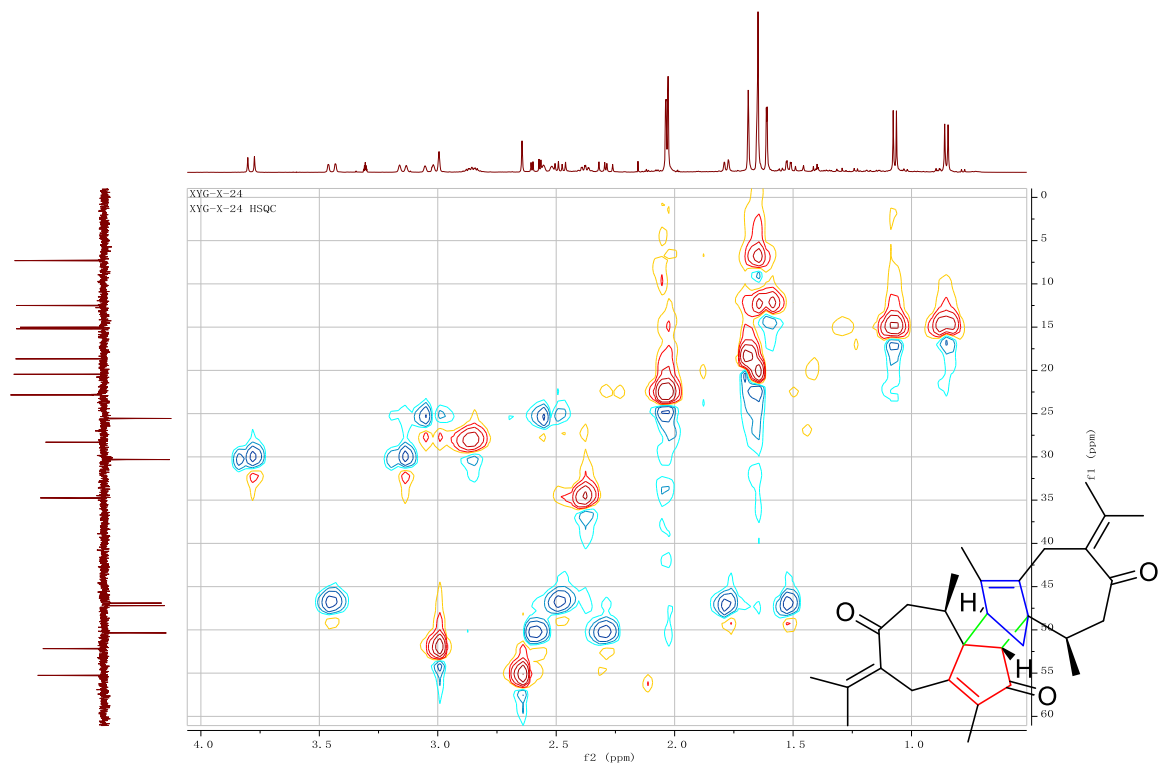

**Fig. S13** HSQC spectrum (500 MHz, CD<sub>3</sub>OD) of compound **2**

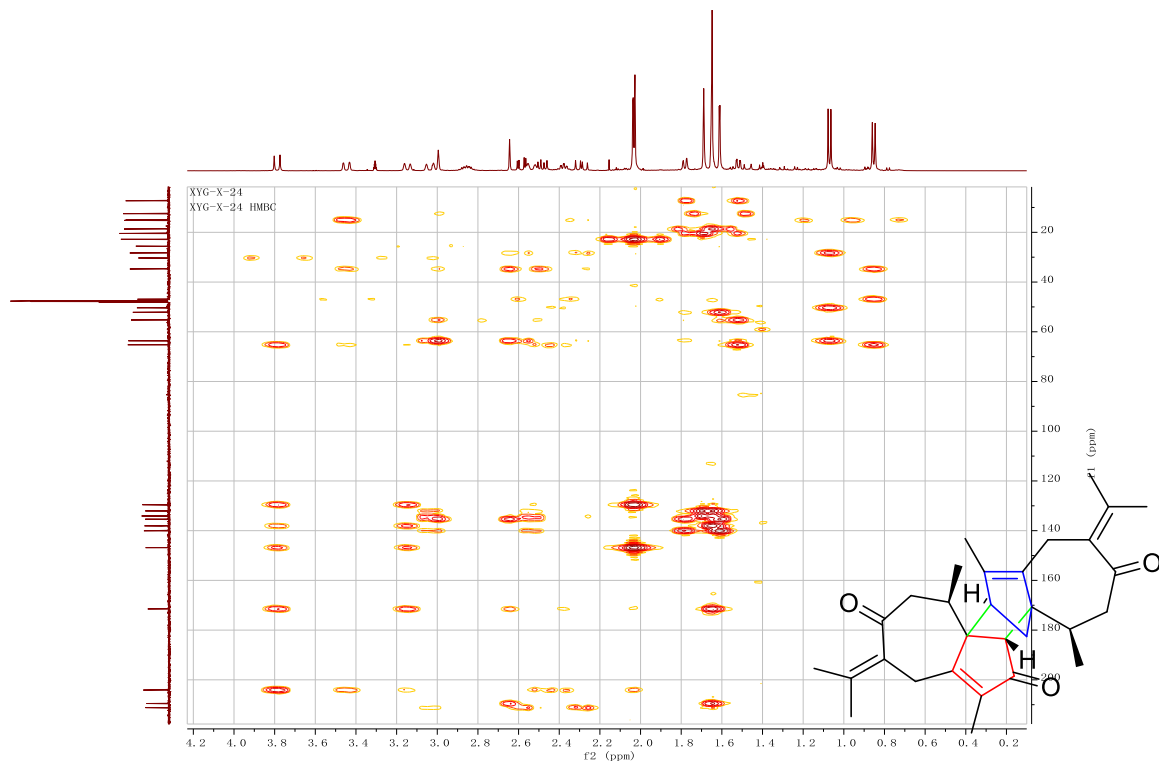

**Fig. S14** HMBC spectrum (500 MHz, CD<sub>3</sub>OD) of compound **2**

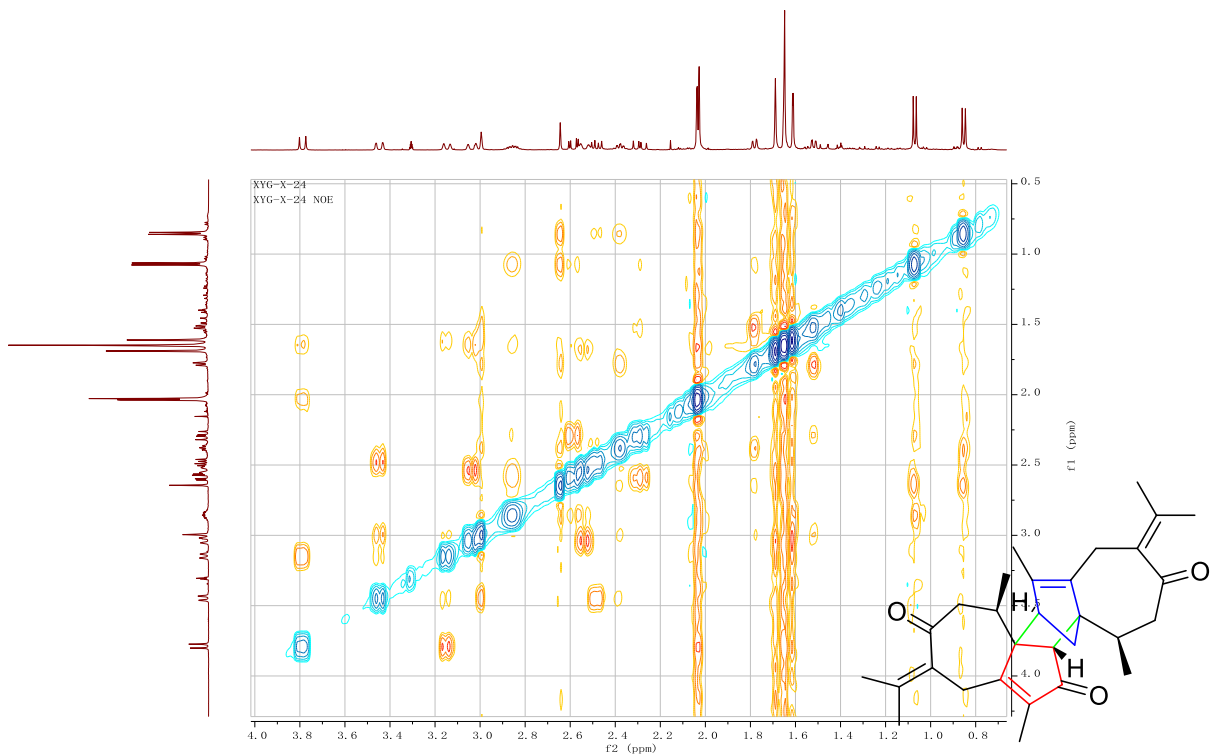

**Fig. S15** NOESY spectrum of compound **2**

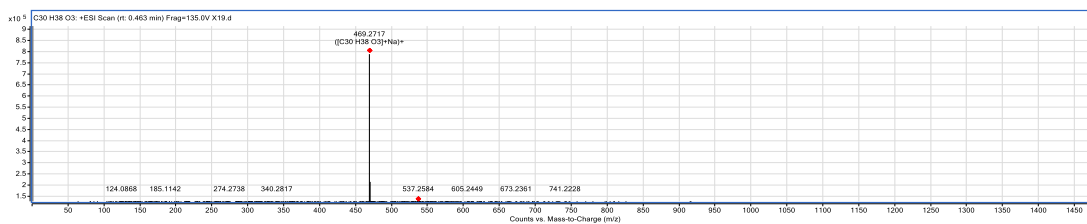

**Fig. S16** HR-ESI-MS spectrum of compound **2**

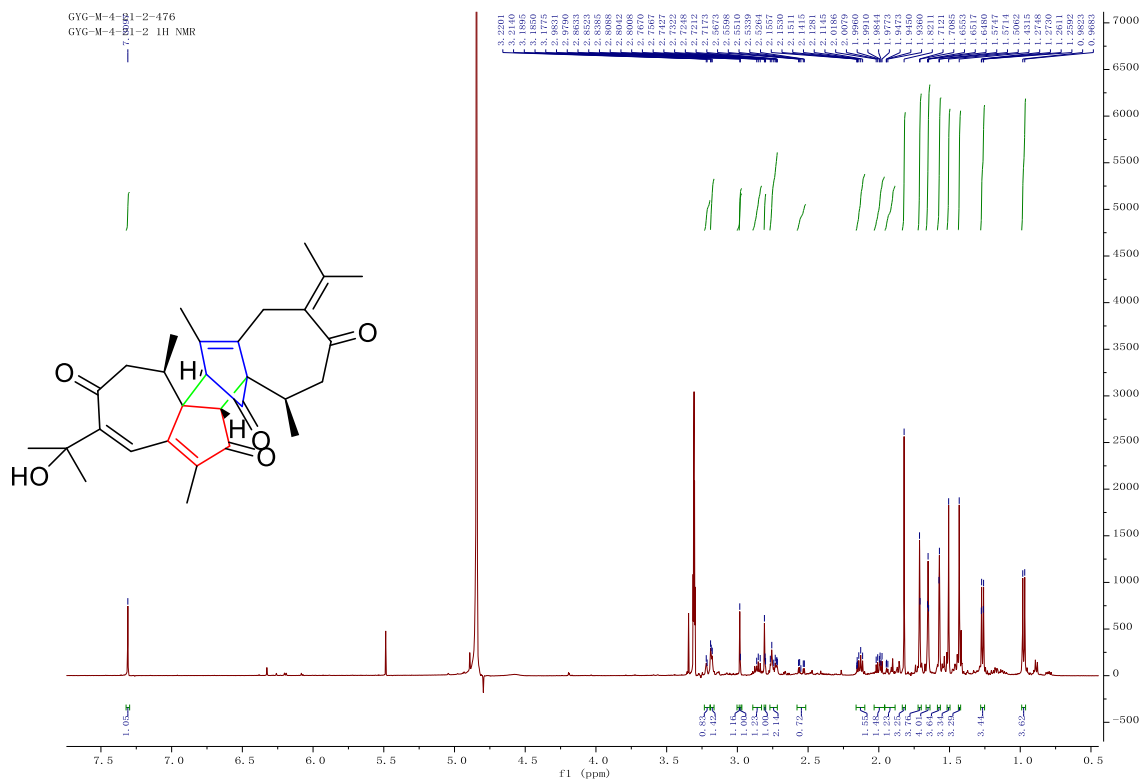

Fig. S17  $^1\text{H}$  NMR spectrum (500 MHz,  $\text{CD}_3\text{OD}$ ) of compound 3

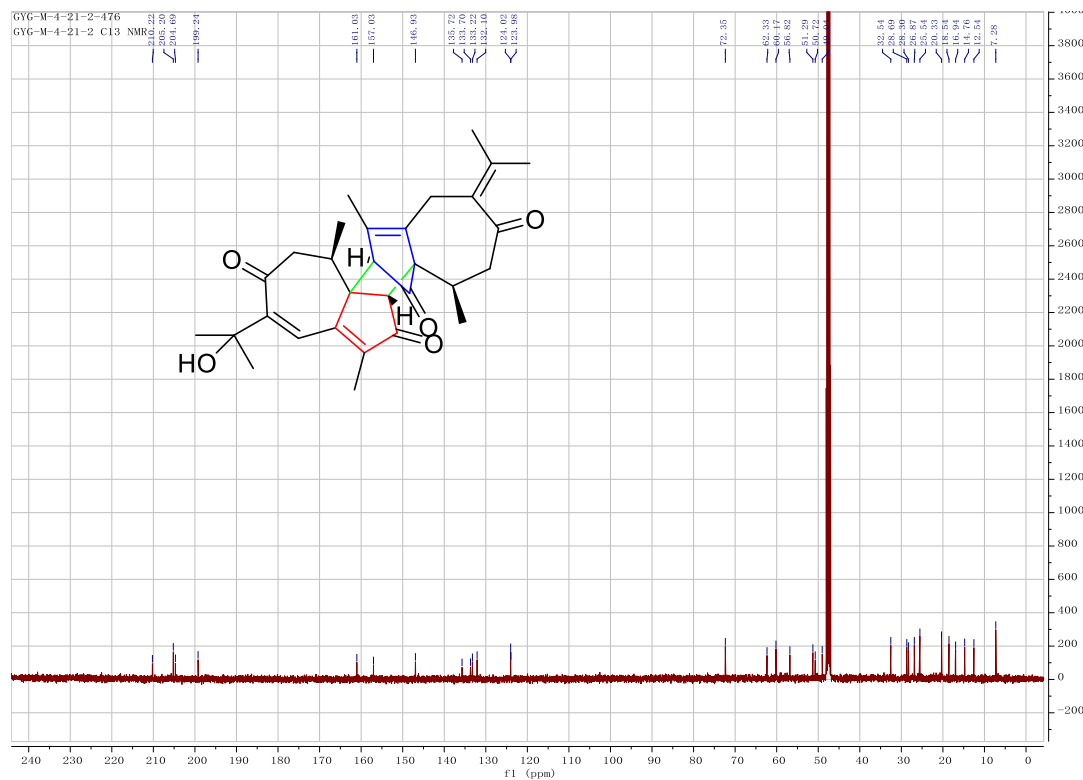

Fig. S18  $^{13}\text{C}$  NMR spectrum (125 MHz,  $\text{CD}_3\text{OD}$ ) of compound 3

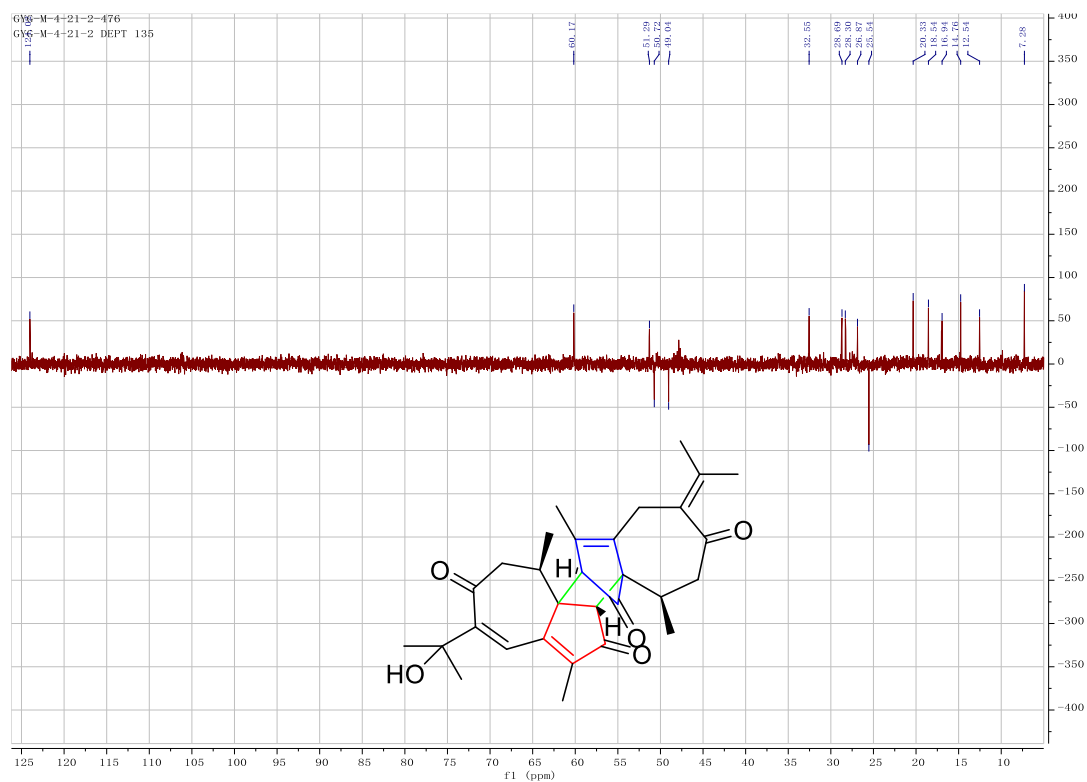

**Fig. S19** DEPT spectrum (125 MHz, CD<sub>3</sub>OD) of compound **3**

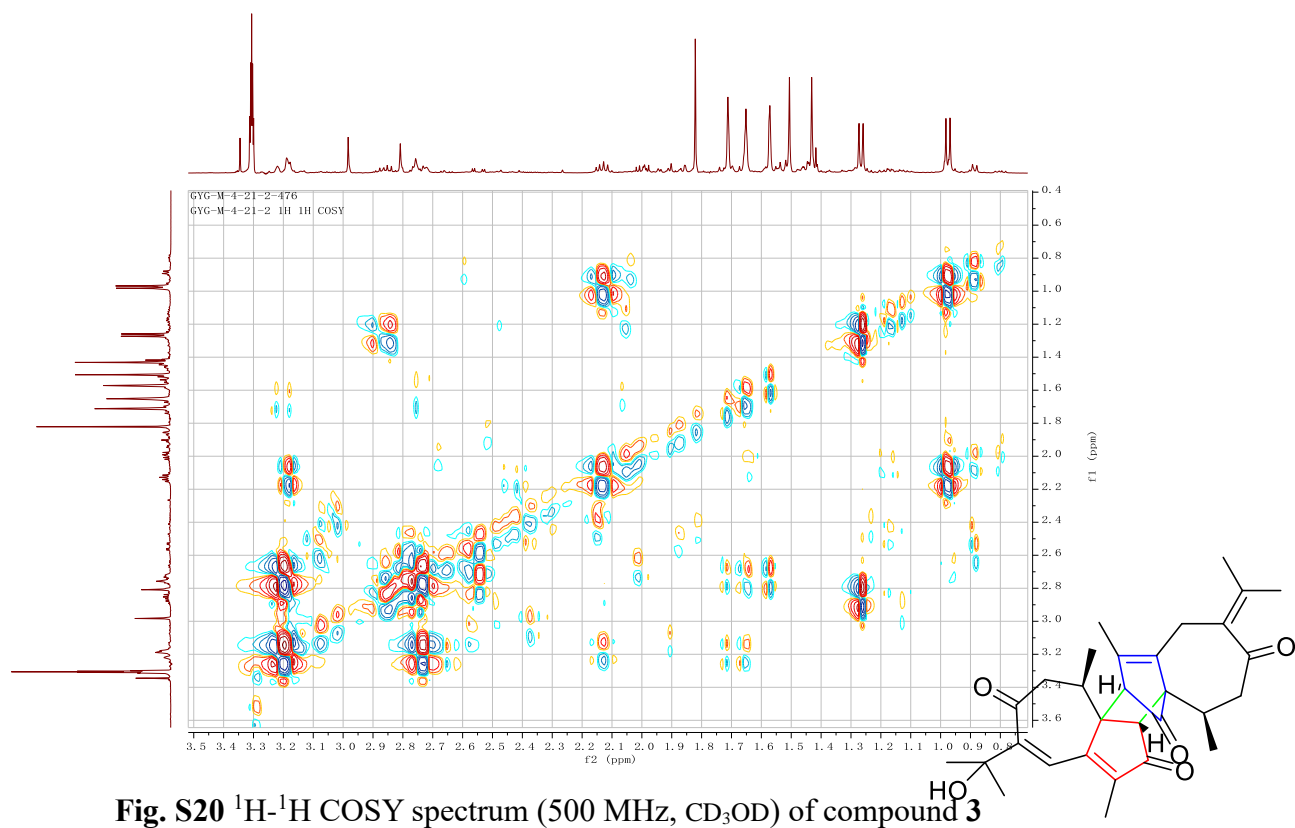

**Fig. S20** <sup>1</sup>H-<sup>1</sup>H COSY spectrum (500 MHz, CD<sub>3</sub>OD) of compound **3**

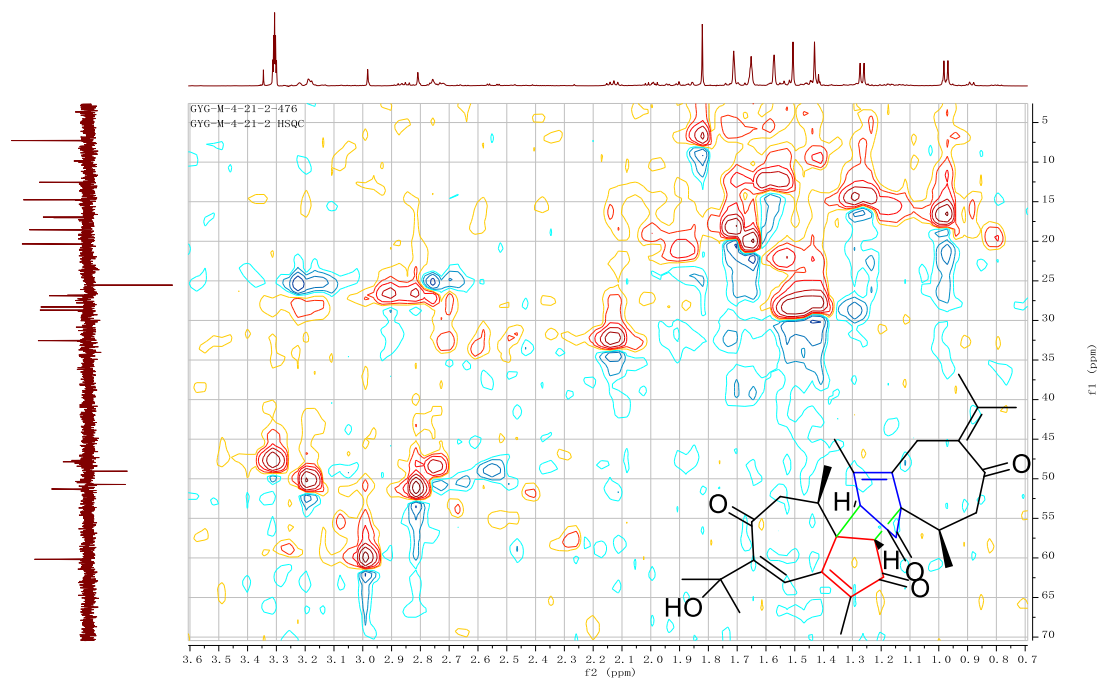

**Fig. S21** HSQC spectrum (500 MHz, CD<sub>3</sub>OD) of compound **3**

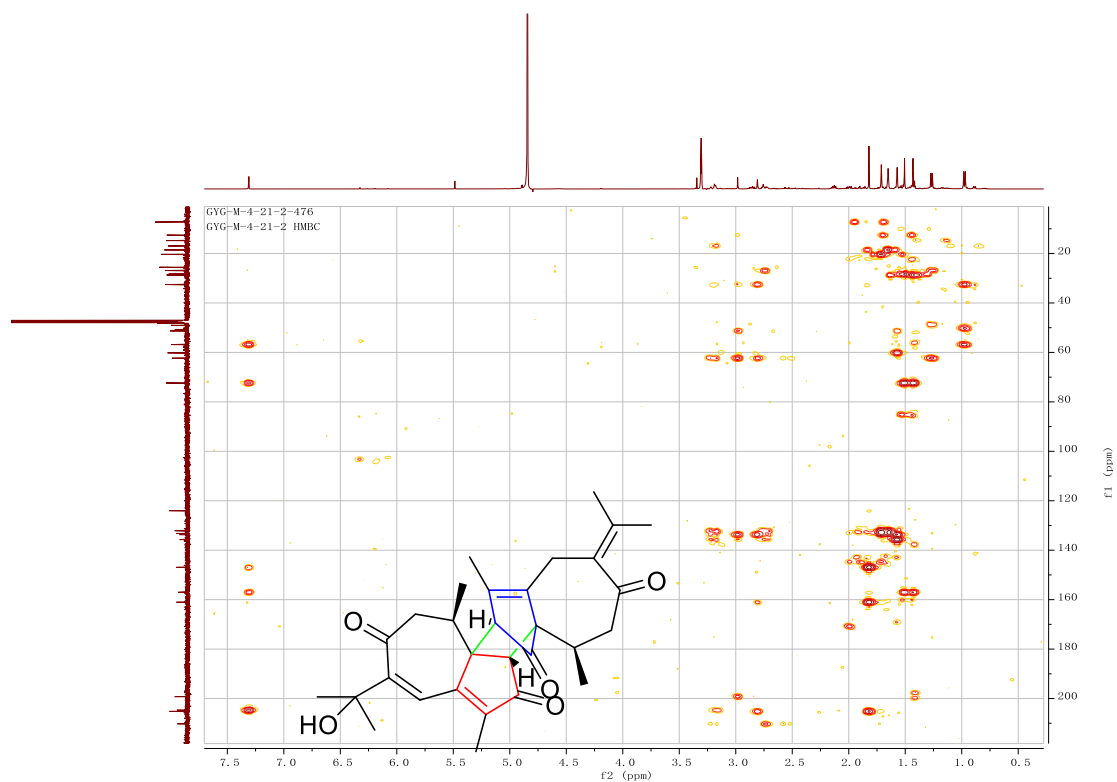

**Fig. S22** HMBC spectrum (500 MHz, CD<sub>3</sub>OD) of compound **3**

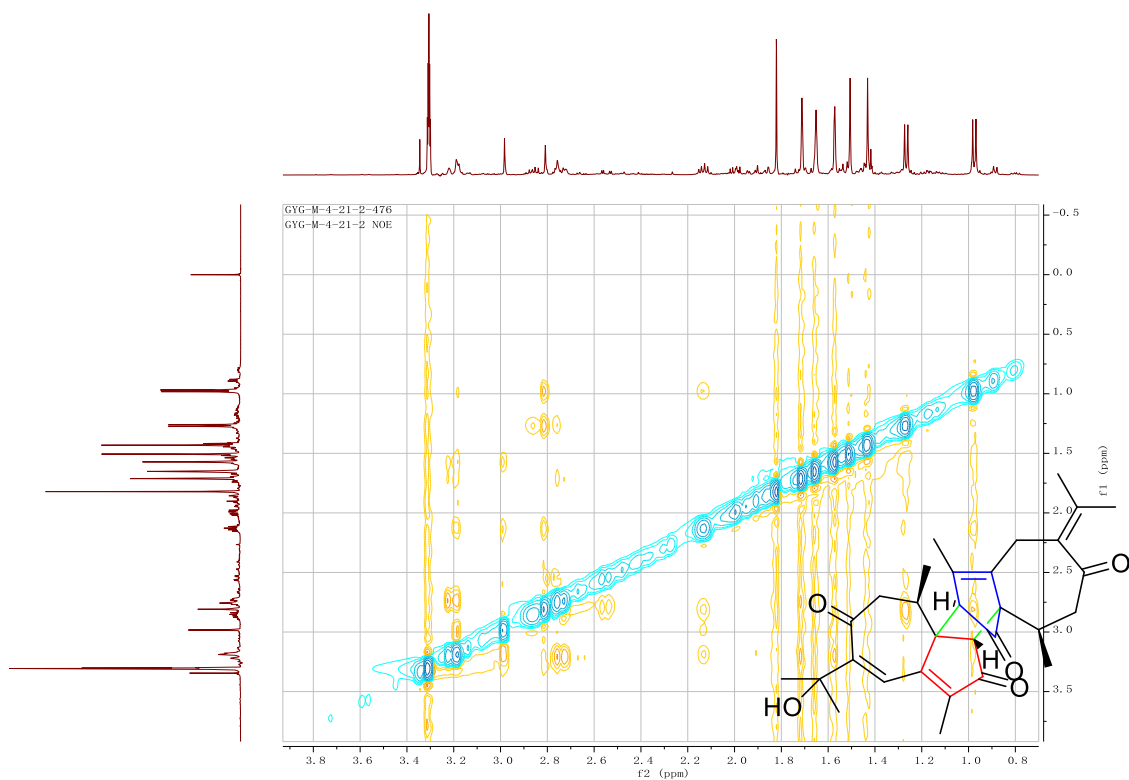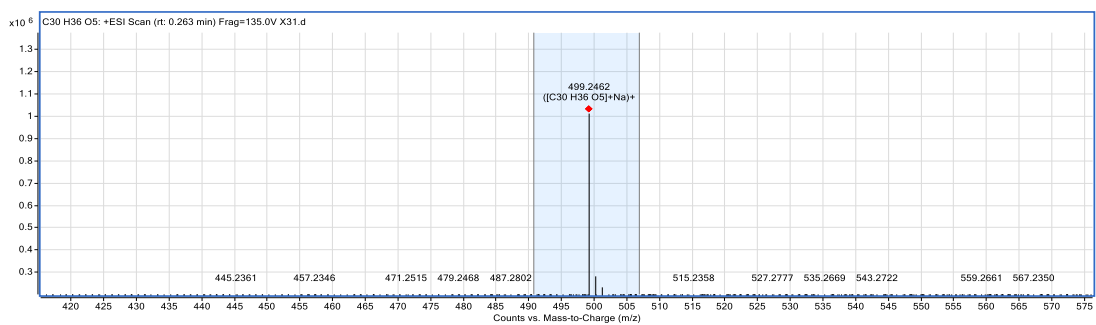

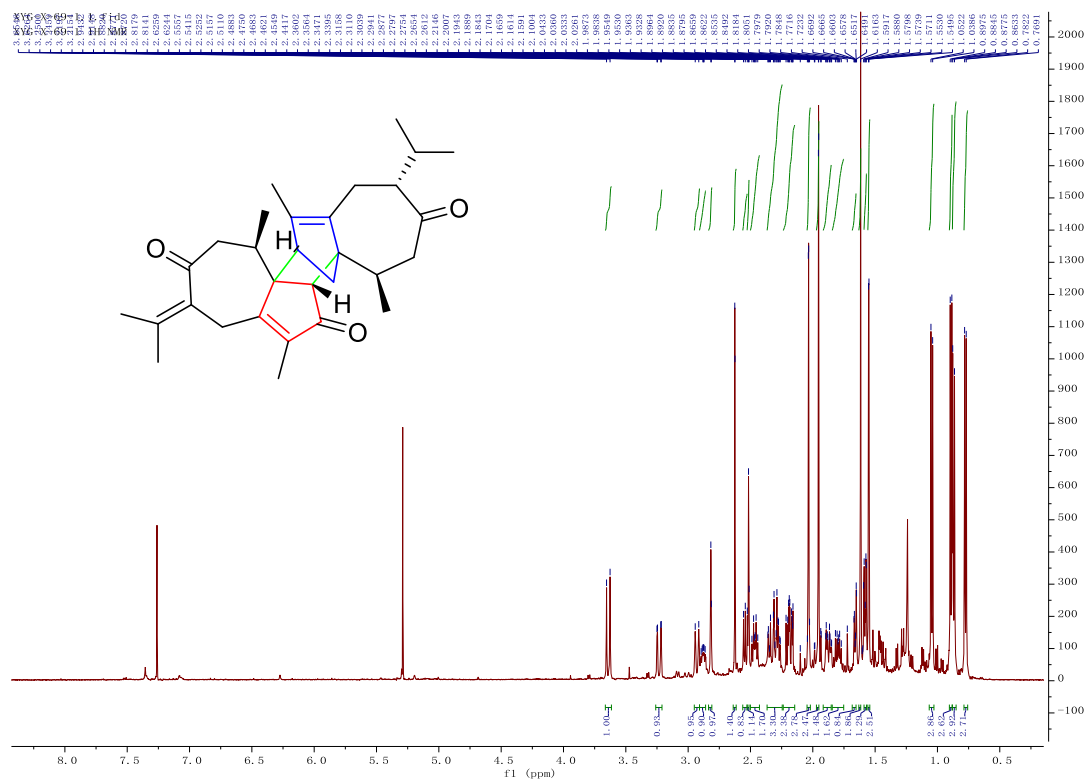

Fig. S25  $^1\text{H}$  NMR spectrum (500 MHz,  $\text{CDCl}_3$ ) of compound 4

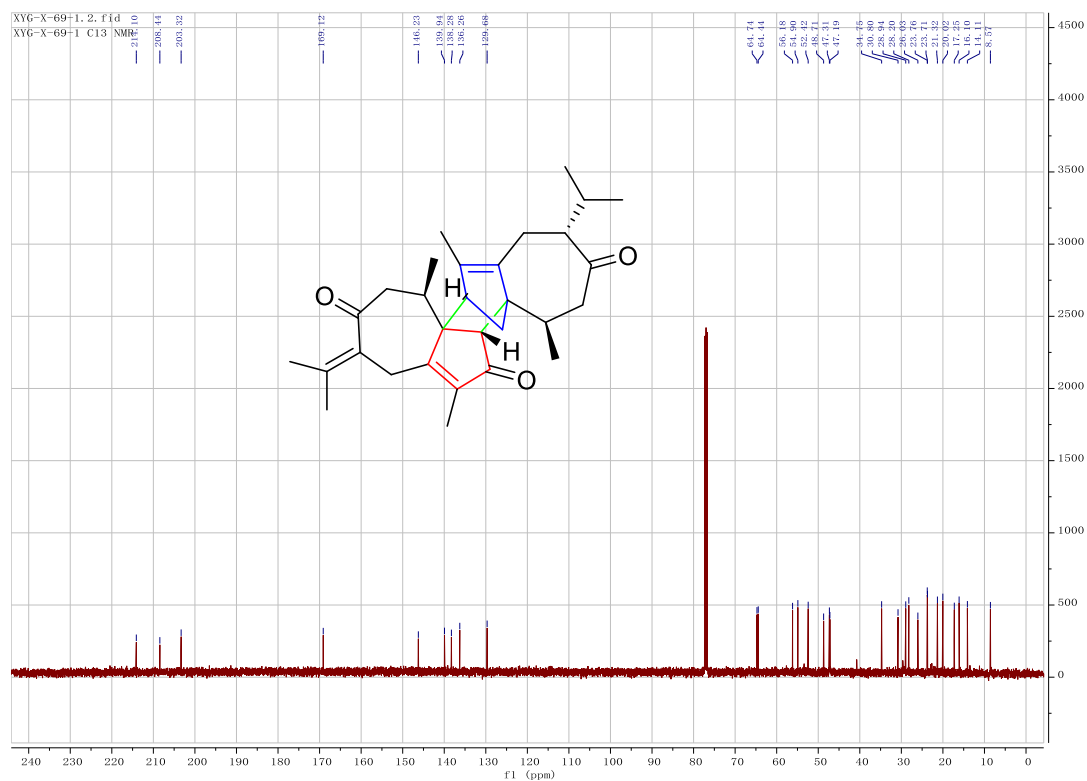

Fig. S26  $^{13}\text{C}$  NMR spectrum (125 MHz,  $\text{CDCl}_3$ ) of compound 4



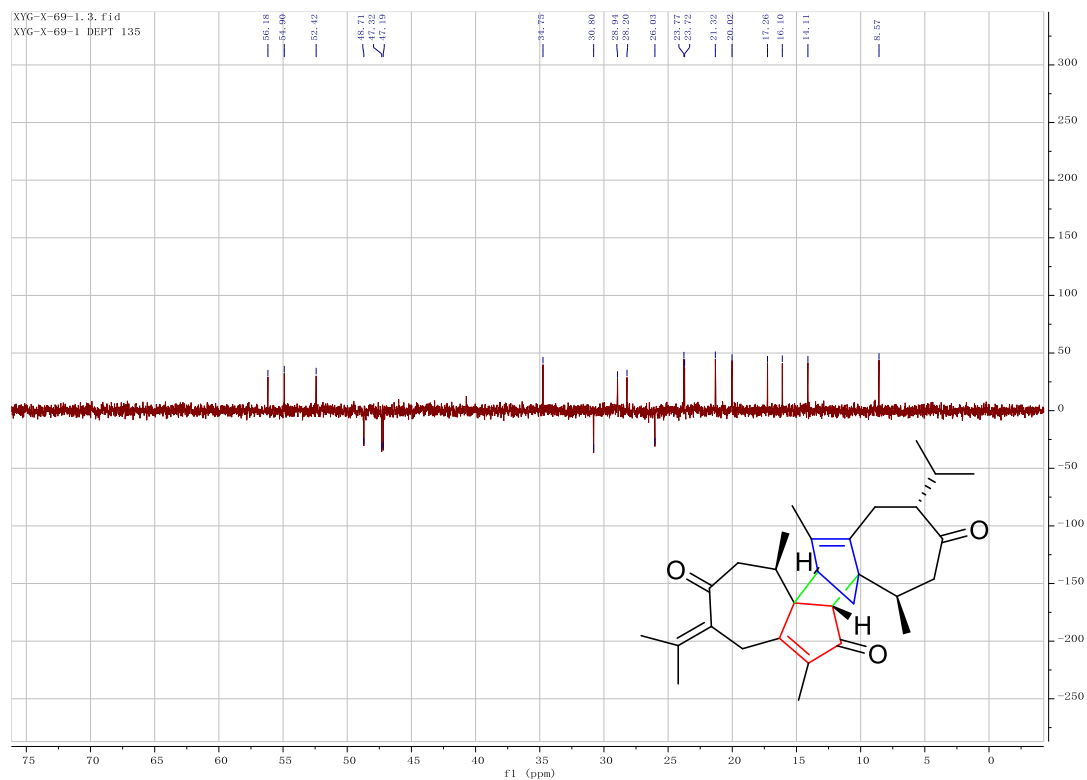

**Fig. S27** DEPT spectrum (125 MHz, Chloroform-*d*) of compound **4**

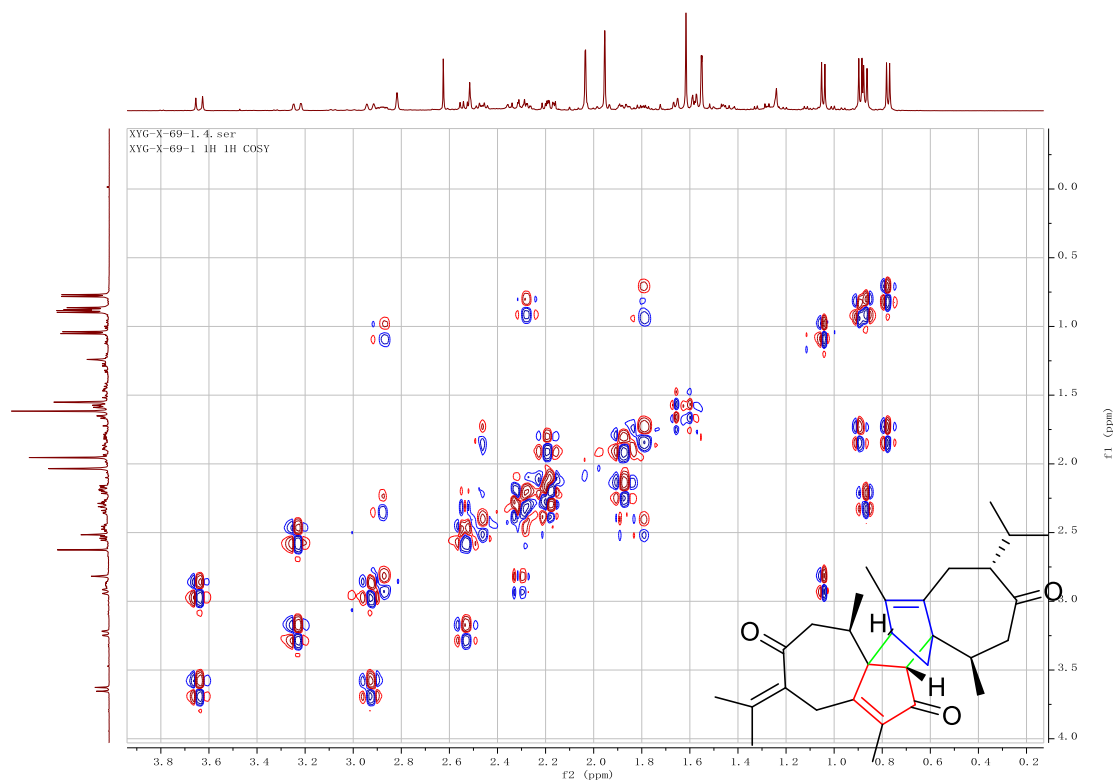

**Fig. S28**  $^1\text{H}$ - $^1\text{H}$  COSY spectrum (500 MHz, Chloroform-*d*) of compound **4**

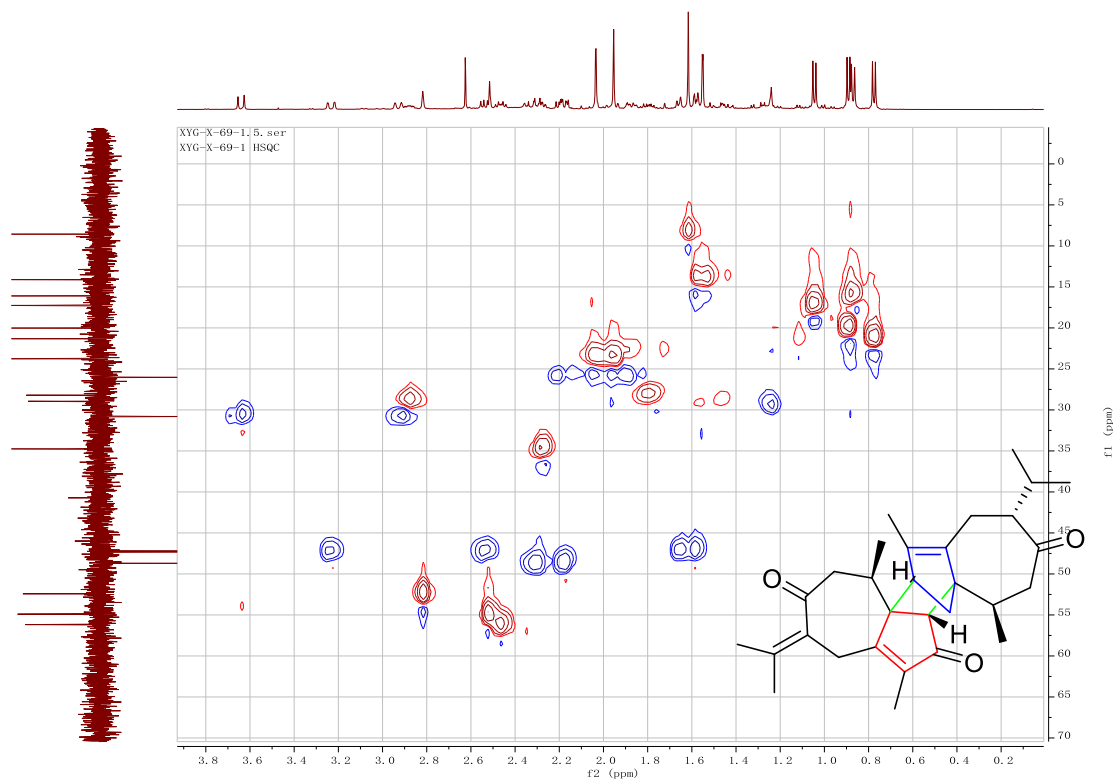

**Fig. S29** HSQC spectrum (500 MHz, Chloroform-*d*) of compound **4**

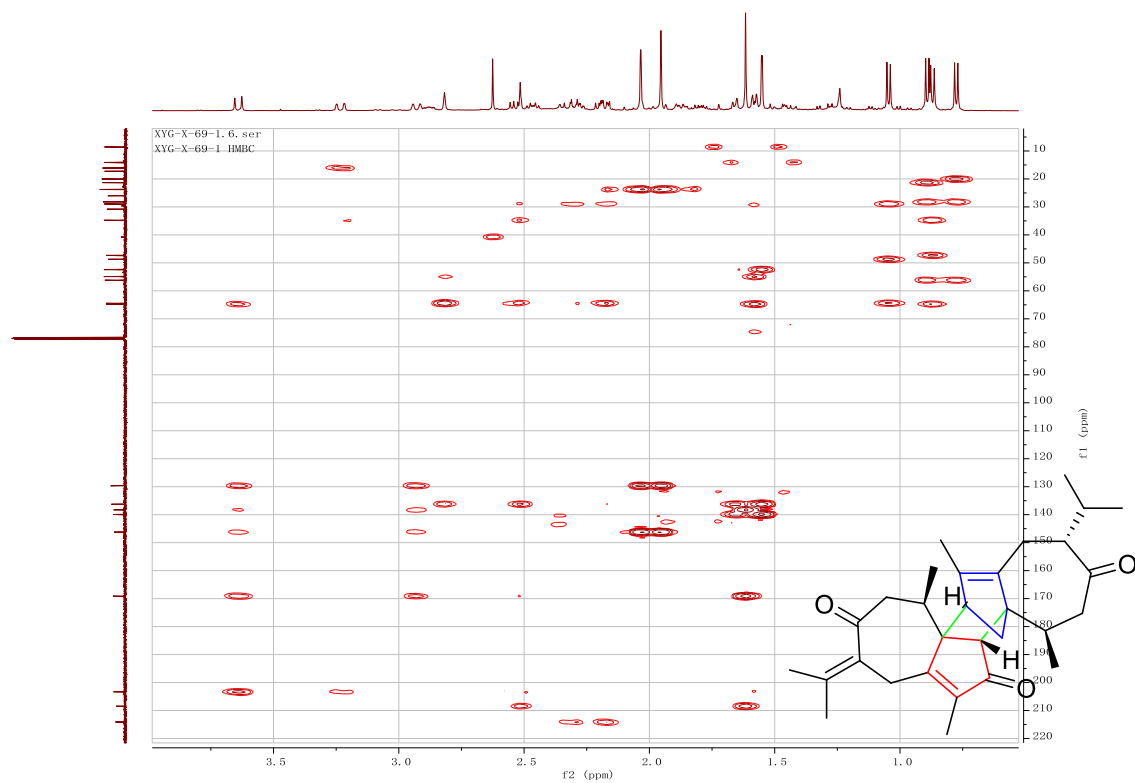

**Fig. S30** HMBC spectrum (500 MHz, Chloroform-*d*) of compound **4**

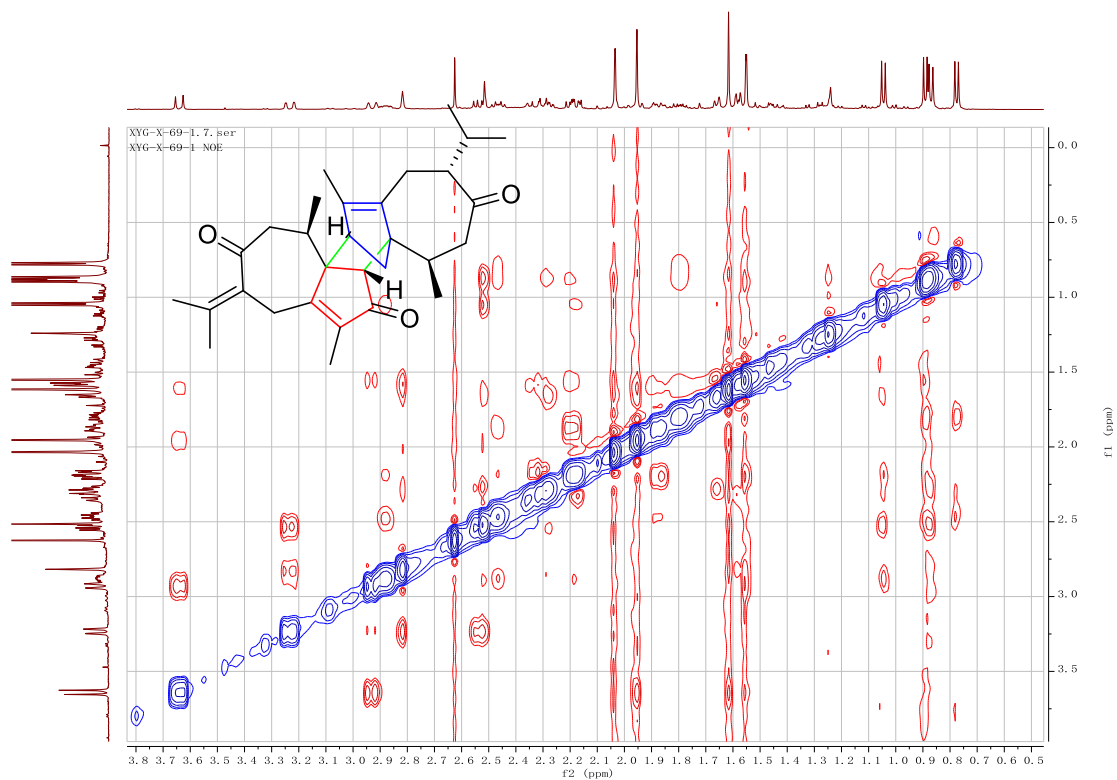

**Fig. S31** NOESY spectrum (500 MHz, Chloroform-*d*) of compound **4**

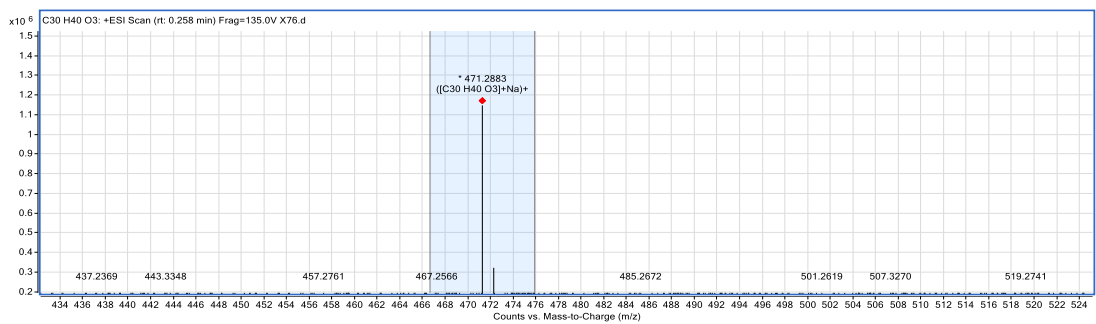

**Fig. S32** HR-ESI-MS spectrum of compound **4**



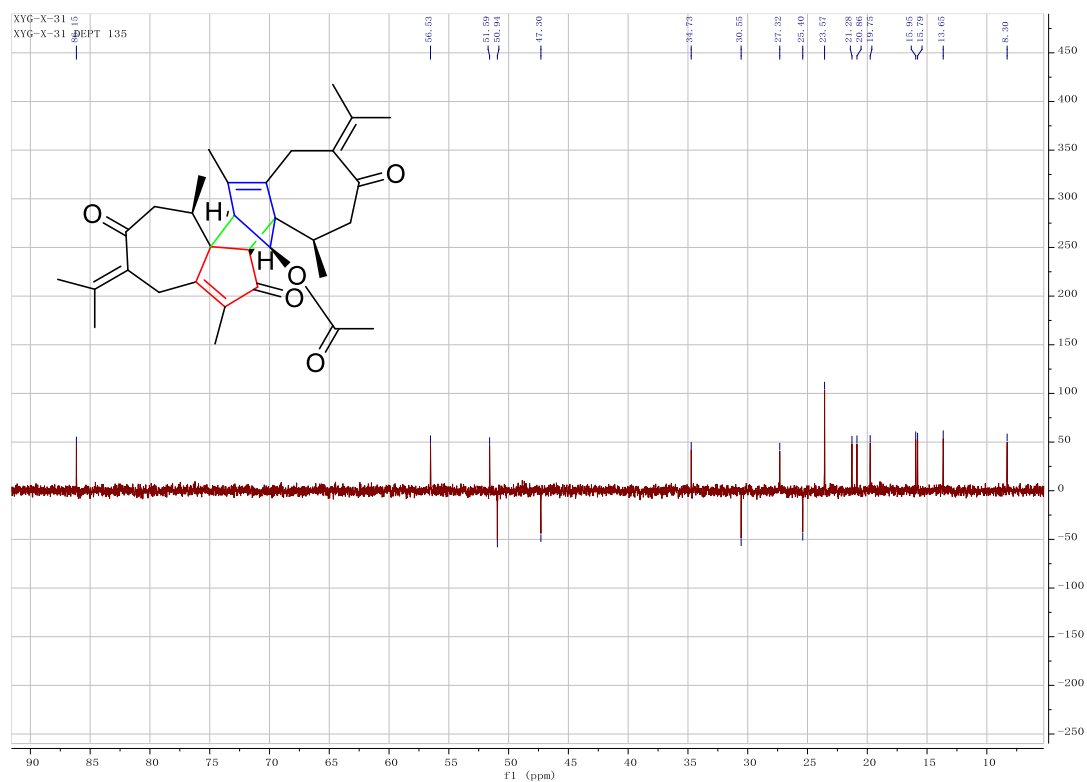

**Fig. S35** DEPT spectrum (125 MHz, Chloroform-*d*:CD<sub>3</sub>OD 1:2) of compound **5**

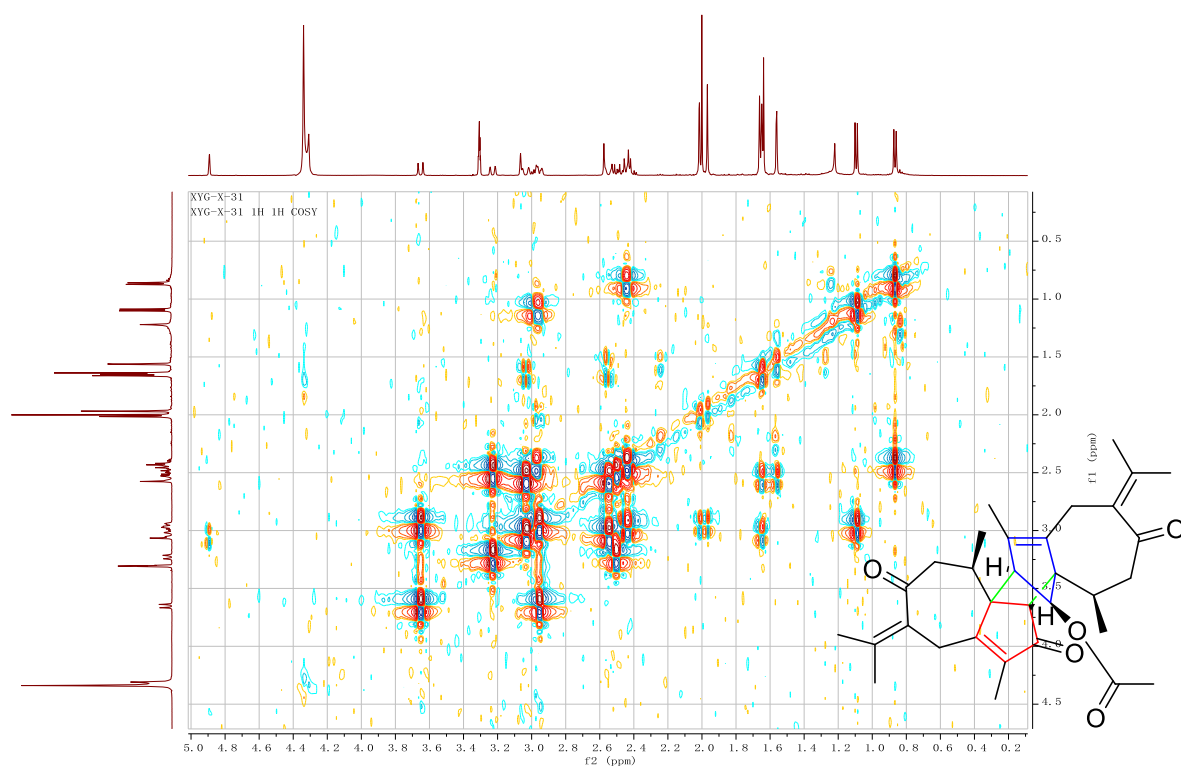

**Fig. S36** <sup>1</sup>H-<sup>1</sup>H COSY spectrum (500 MHz, Chloroform-*d*:CD<sub>3</sub>OD 1:2) of compound **5**

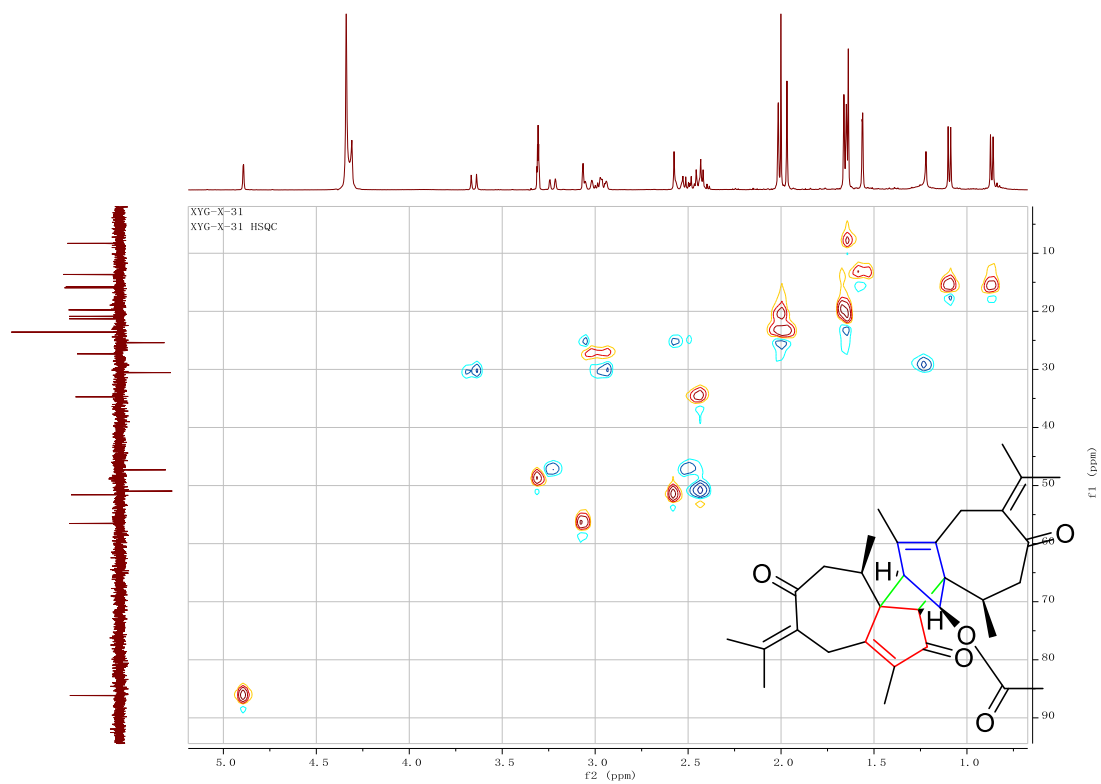

**Fig. S37** HSQC spectrum (500 MHz, Chloroform-*d*:CD<sub>3</sub>OD 1:2) of compound **5**

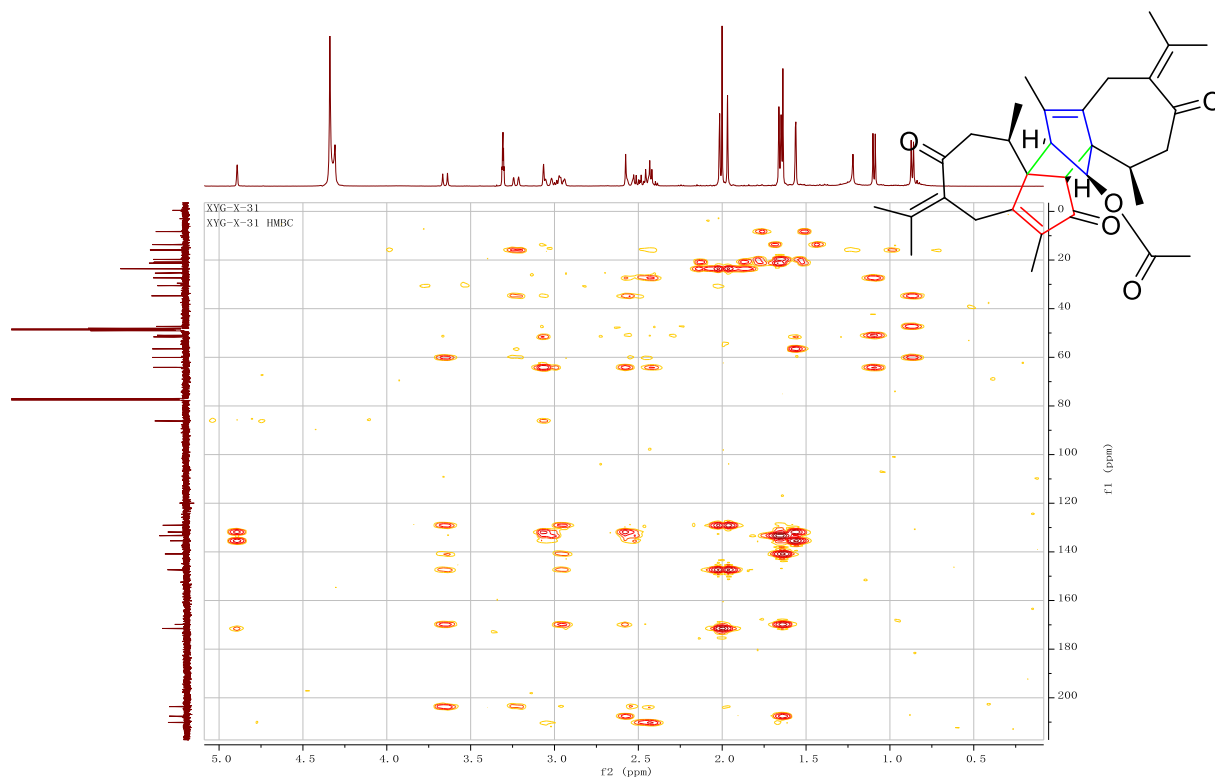

**Fig. S38** HMBC spectrum (500 MHz, Chloroform-*d*:CD<sub>3</sub>OD 1:2) of compound **5**

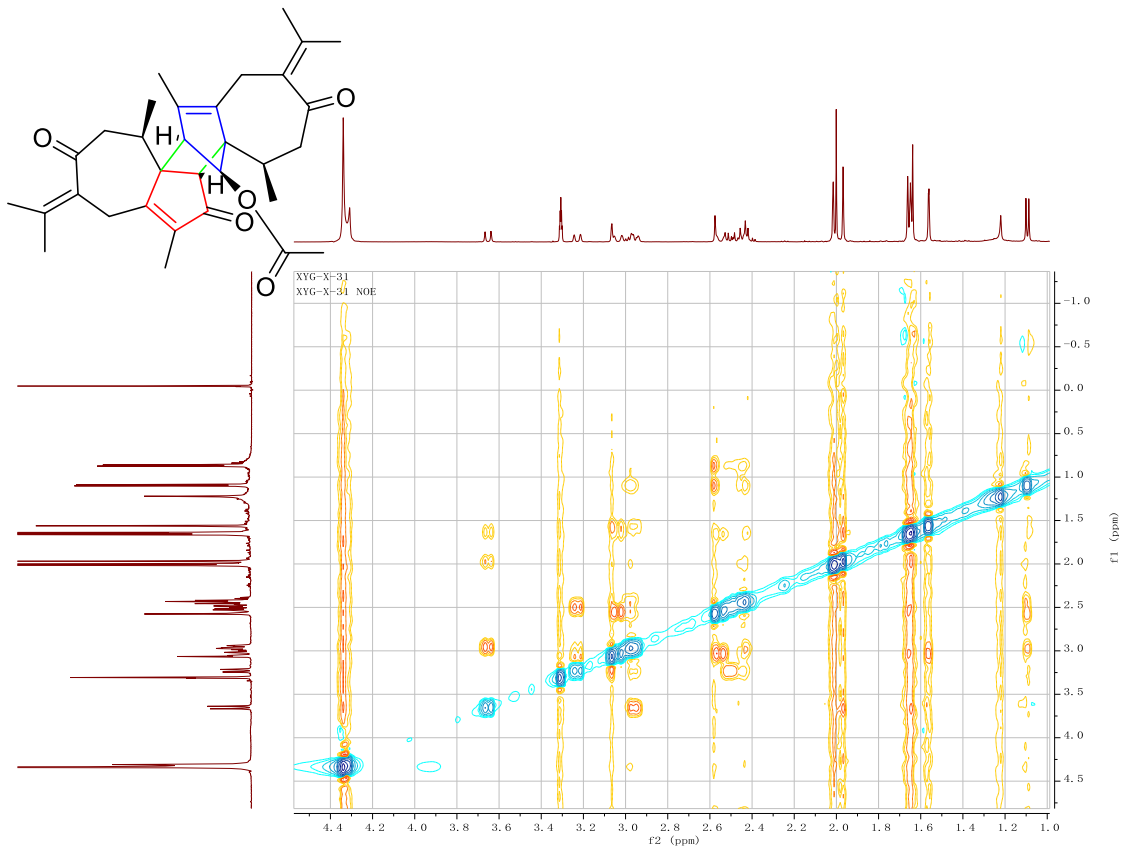

**Fig. S39** NOESY spectrum (500 MHz, Chloroform-*d*:CD<sub>3</sub>OD 1:2) of compound **5**

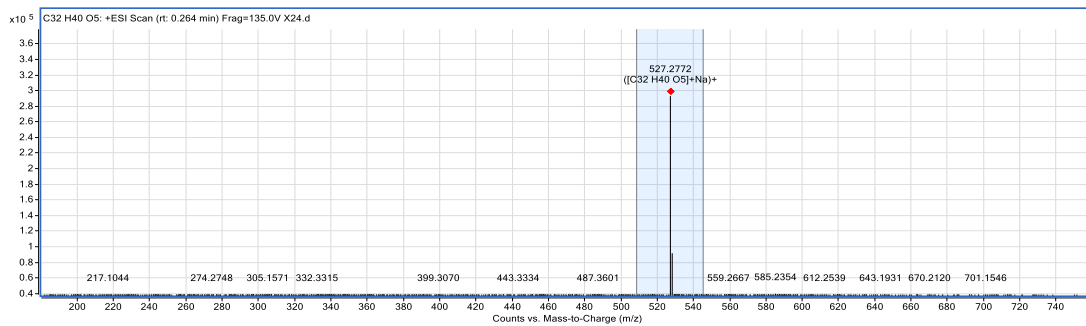

**Fig. S40** HR-ESI-MS spectrum of compound **5**





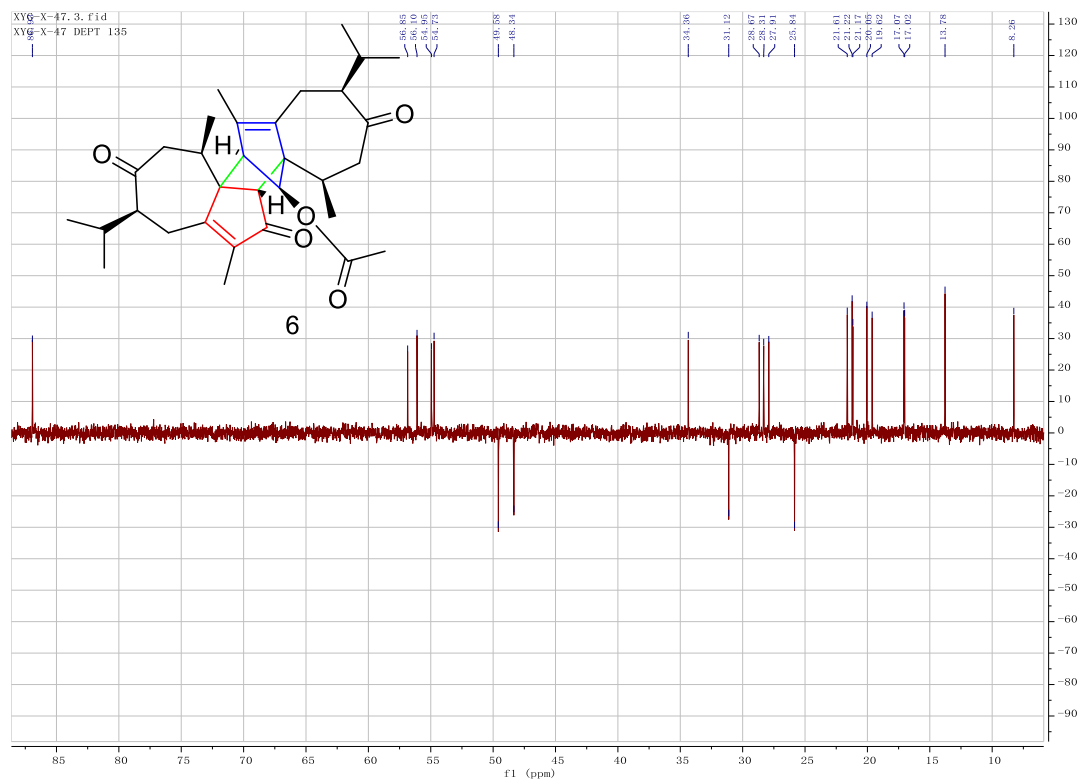

Fig. S43 DEPT spectrum (125 MHz, Chloroform-*d*) of compound 6

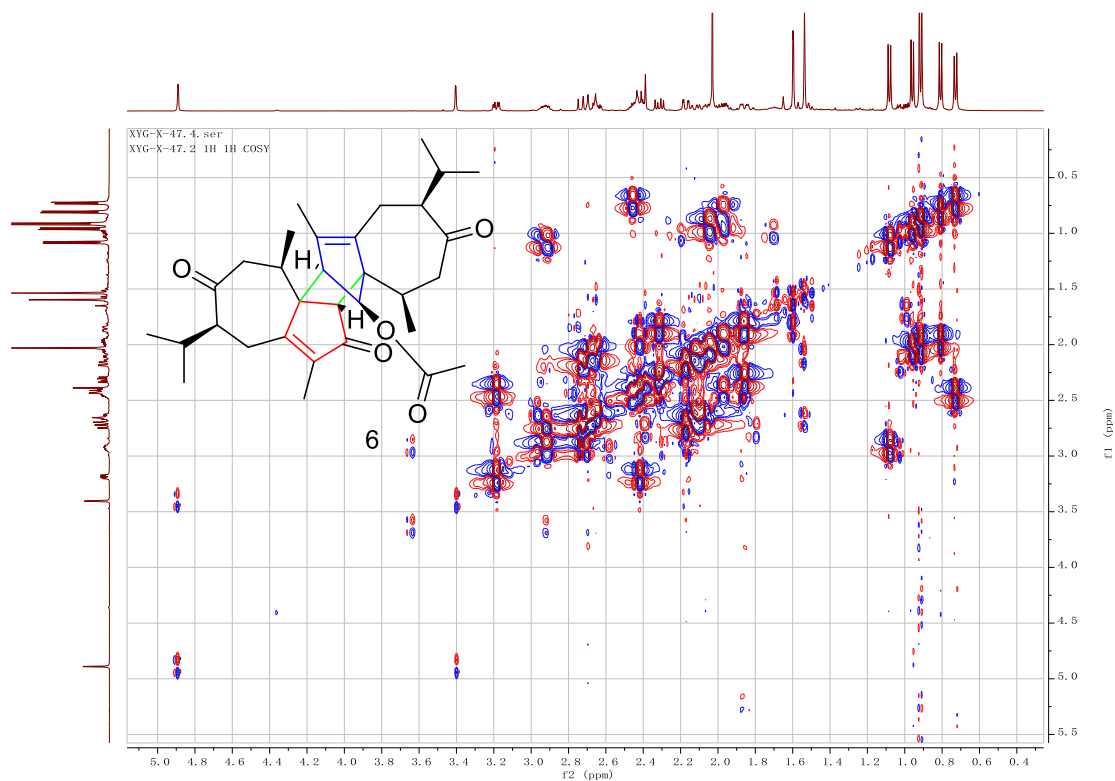

Fig. S44  $^1\text{H}$ - $^1\text{H}$  COSY spectrum (500 MHz, Chloroform-*d*) of compound 6

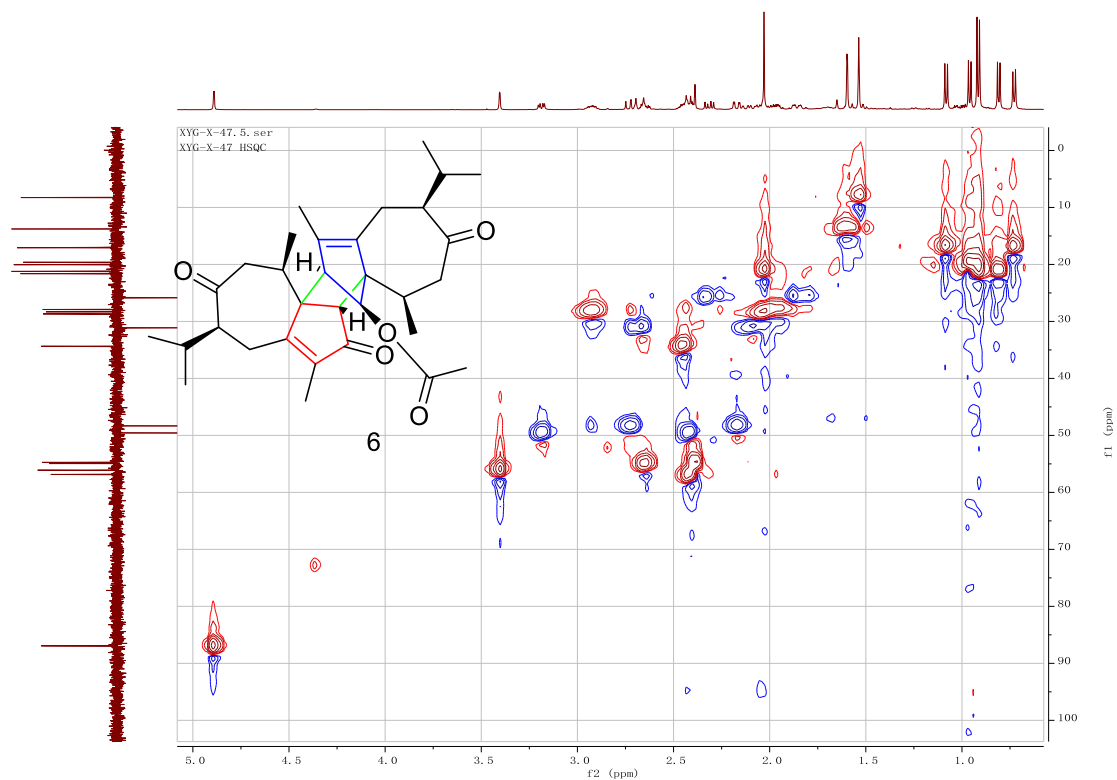

**Fig. S45** HSQC spectrum (500 MHz, Chloroform-*d*) of compound **6**

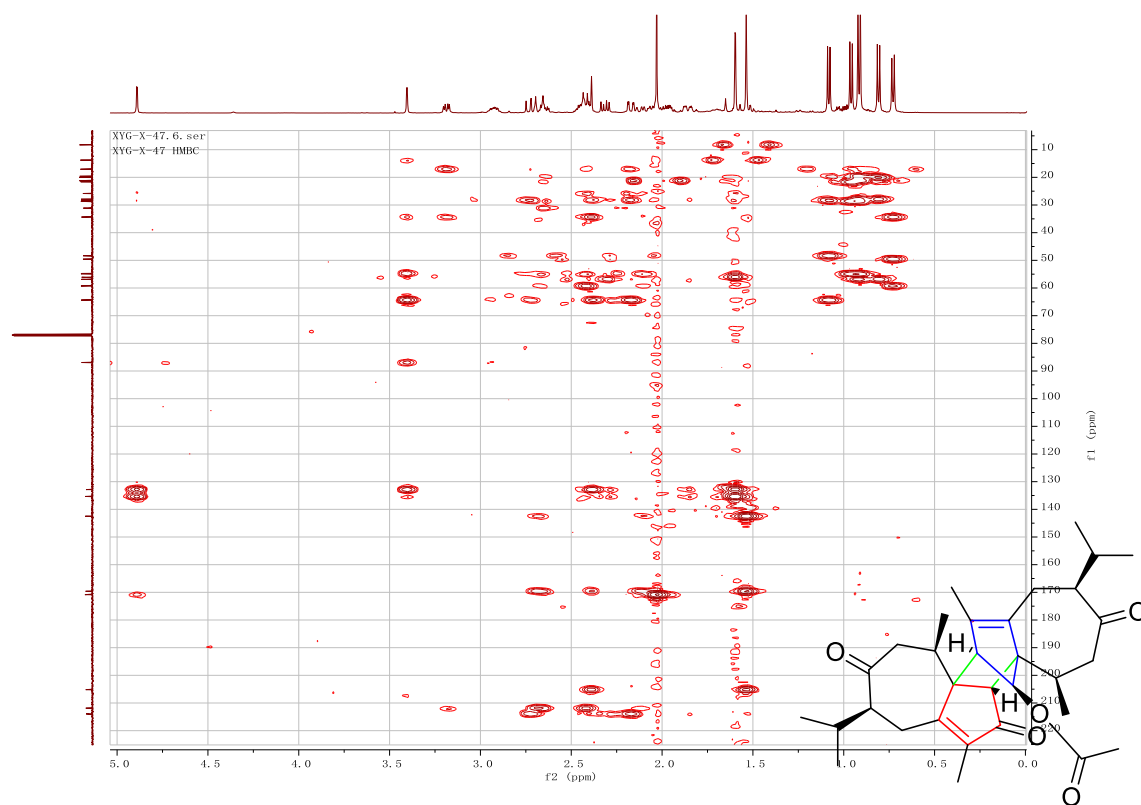

**Fig. S46** HMBC spectrum (500 MHz, Chloroform-*d*) of compound **6**

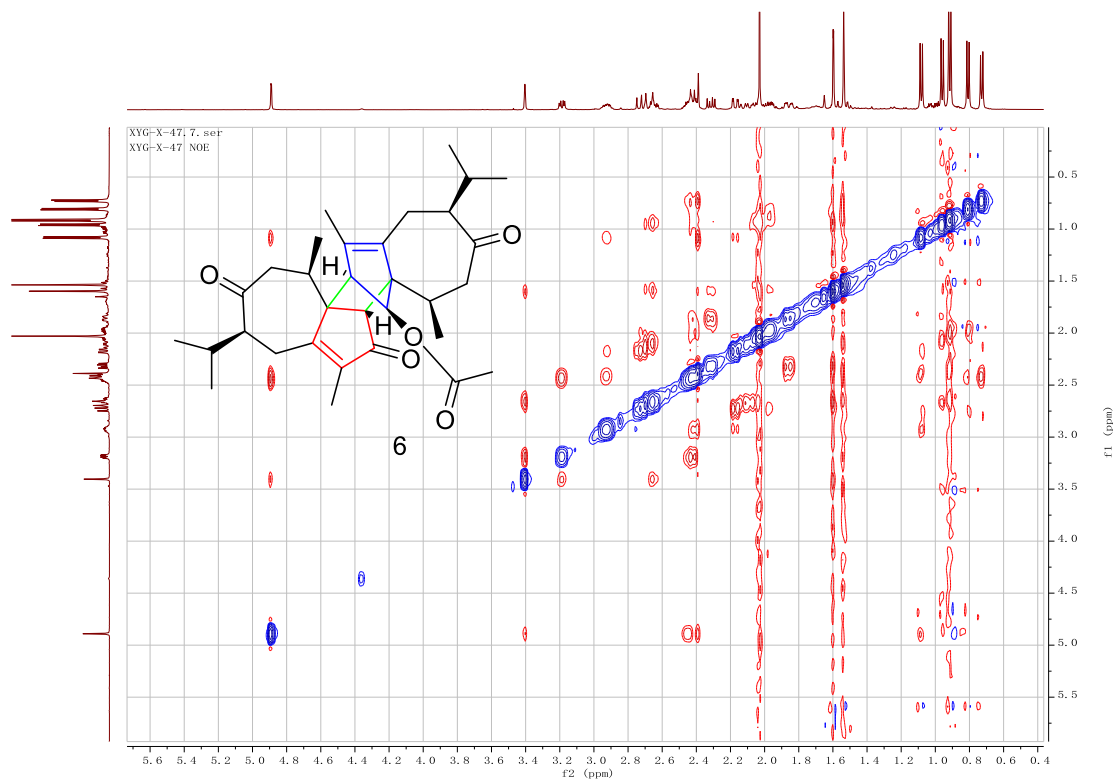

**Fig. S47** NOESY spectrum (500 MHz, Chloroform-*d*) of compound **6**

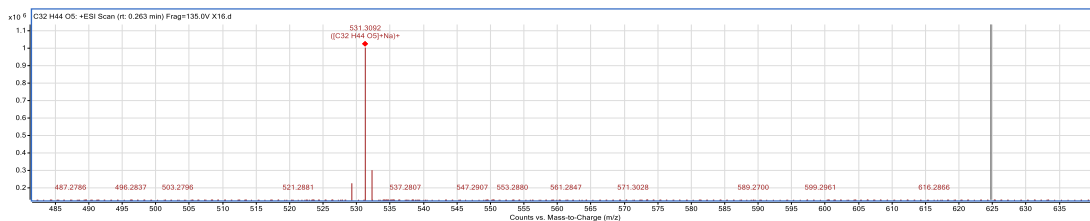

**Fig. S48** HR-ESI-MS spectrum of compound **6**

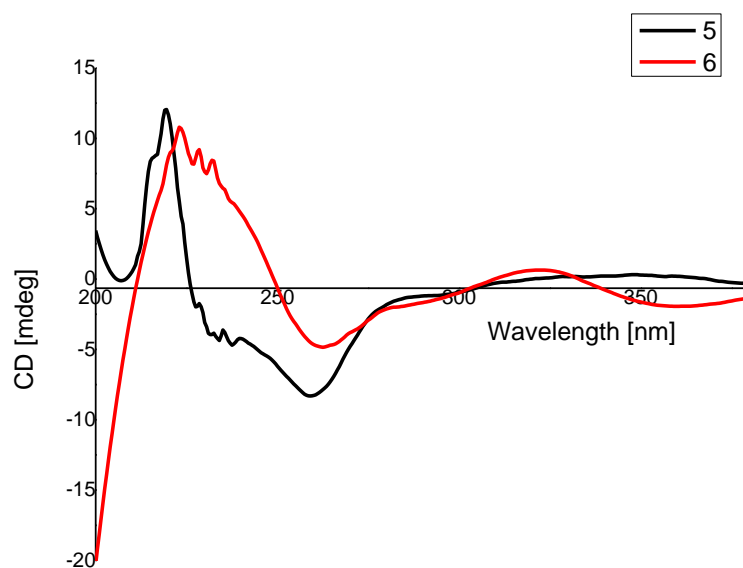

**Fig. S49** The CD spectrum of compounds **5** and **6**

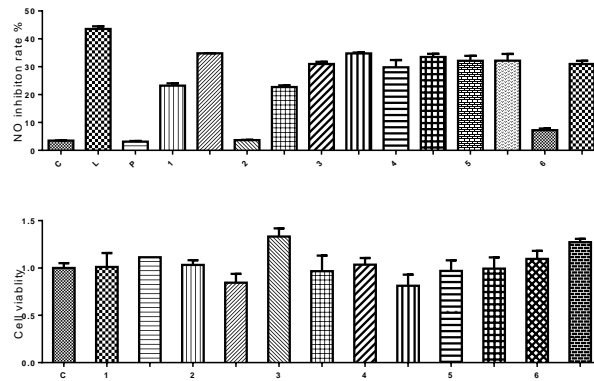

**Fig. S50** Inhibitory effect of compounds **1–6** (50  $\mu$ M 10  $\mu$ M) against NO production in LPS-stimulated RAW264.7macrophages and cytotoxic effects of compounds **1–6** in the MTT assay (Raw 264.7 cells). [C: control; L: LPS group; P: positive group] Parthenolide (10  $\mu$ M) was used as a positive control.
